## Coiled-coil registry shifts in the F684I mutant of Bicaudal result in cargo-independent activation of dynein motility

Heying Cui<sup>1</sup>, Kathleen M. Trybus<sup>2</sup>, M. Yusuf Ali<sup>2</sup>, Puja Goyal<sup>1</sup>, Kaiqi Zhang<sup>1</sup>, Jia Ying Loh<sup>1</sup>, Sozanne R. Solmaz<sup>1,\*</sup>

<sup>1</sup>Department of Chemistry, State University of New York at Binghamton, PO Box 6000, Binghamton, NY 13902. <sup>2</sup>Department of Molecular Physiology & Biophysics, University of Vermont, Burlington VT 05405.

Running title: *Structure of the Bicaudal mutant*

Cui ORCID 0000-0002-7244-9670  
Trybus ORCID 0000-0002-5583-8500  
Ali ORCID 0000-0003-2164-3323  
Goyal ORCID 0000-0002-5812-0481  
Solmaz ORCID 0000-0002-1703-3701

\*To whom the correspondence should be addressed: Sozanne R Solmaz, Department of Chemistry, State University of New York at Binghamton, PO Box 6000, Binghamton NY 13902, [ssolmaz@binghamton.edu](mailto:ssolmaz@binghamton.edu), +1 607 777 2089.

1 **ABSTRACT**

2 The dynein adaptor *Drosophila* Bicaudal D (BicD) is auto-inhibited and activates dynein motility only  
3 after cargo is bound, but the underlying mechanism is elusive. In contrast, we show that the full-length  
4 BicD/F684I mutant activates dynein processivity even in the absence of cargo. Our X-ray structure of the  
5 C-terminal domain of the BicD/F684I mutant reveals a coiled-coil registry shift; in the N-terminal region,  
6 the two helices of the homodimer are aligned, whereas they are vertically shifted in the wild-type. One  
7 chain is partially disordered and this structural flexibility is confirmed by computations, which reveal that  
8 the mutant transitions back and forth between the two registries. We propose that a coiled-coil registry  
9 shift upon cargo binding activates BicD for dynein recruitment. Moreover, the human homolog  
10 BicD2/F743I exhibits diminished binding of cargo adaptor Nup358, implying that a coiled-coil registry  
11 shift may be a mechanism to modulate cargo selection for BicD2-dependent transport pathways.  
12

## 13 INTRODUCTION

14

15 Cytoplasmic dynein, the predominant minus-end directed microtubule motor, facilitates a vast number  
16 of cellular transport events (Cianfrocco *et al.*, 2015). Dynein adaptor proteins, such as *Drosophila*  
17 Bicaudal (*Dm BicD*) (Hoogenraad *et al.*, 2001) recognize cargo for dynein-dependent transport. Cargo-  
18 bound adaptors are required to activate metazoan dynein for processive transport and are therefore an  
19 essential part of the dynein transport machinery (Chowdhury *et al.*, 2015; McKenney *et al.*, 2014;  
20 Schlager, Hoang, *et al.*, 2014; Schlager, Serra-Marques, *et al.*, 2014; Splinter *et al.*, 2012; Urnavicius *et*  
21 *al.*, 2015). In the absence of cargo, BicD forms an auto-inhibited looped conformation, in which the C-  
22 terminal cargo binding region (CTD) binds to the N-terminal dynein/dynactin-binding site (coiled-coil  
23 domain 1, CC1), sterically preventing motor binding (Chowdhury *et al.*, 2015; Liu *et al.*, 2013;  
24 McClintock *et al.*, 2018; McKenney *et al.*, 2014; Schlager, Hoang, *et al.*, 2014; Schlager, Serra-Marques,  
25 *et al.*, 2014; Sladewski *et al.*, 2018; Splinter *et al.*, 2012; Terawaki *et al.*, 2015; Urnavicius *et al.*, 2015).  
26 The CTD is required for auto-inhibition, since a truncated BicD-CC1 construct without it activates dynein  
27 for processive transport in the absence of cargo (McKenney *et al.*, 2014; Schlager, Hoang, *et al.*, 2014).  
28 Auto-inhibition of full-length BicD is released upon cargo binding (Chowdhury *et al.*, 2015; Liu *et al.*,  
29 2013; McClintock *et al.*, 2018; McKenney *et al.*, 2014; Schlager, Hoang, *et al.*, 2014; Schlager, Serra-  
30 Marques, *et al.*, 2014; Sladewski *et al.*, 2018; Splinter *et al.*, 2012; Terawaki *et al.*, 2015; Urnavicius *et*  
31 *al.*, 2015); however, the underlying molecular mechanism is elusive.

32 Notably, auto-inhibition is compromised in the classical *Dm BicD* Bicaudal mutant F684I, which  
33 recruits larger amounts of dynein from cell extracts compared to wild-type *Dm BicD* (Liu *et al.*, 2013).  
34 The mutation causes dynein and Egalitarian-dependent mRNA transport defects and subsequent anterior  
35 accumulation of the *Oskar* mRNA pool (Mach & Lehmann, 1997; Mohler & Wieschaus, 1986; Navarro  
36 *et al.*, 2004; Zimyanin *et al.*, 2008), which result in a classical developmental phenotype that includes  
37 double-abdomen flies (Bull, 1966; Liu *et al.*, 2013; Mohler & Wieschaus, 1986; Wharton & Struhl,  
38 1989). Therefore, the Bicaudal mutant could potentially serve as a tool to investigate the molecular  
39 mechanism of BicD-auto-inhibition.

40 *Dm BicD* facilitates the transport of mRNA and Golgi-derived vesicles and is recruited to these  
41 cargoes via protein cofactors that are termed cargo adaptors. The most well characterized cargo adaptors  
42 for *Dm BicD* are Egalitarian (Dienstbier *et al.*, 2009) and Rab6<sup>GTP</sup>, which facilitate transport of mRNAs  
43 and Golgi-derived vesicles, respectively (Matanis *et al.*, 2002). The predominant cargo adaptors for the  
44 human homologs Bicaudal D2 (*Hs BicD2*) and Bicaudal D1 (*Hs BicD1*) are Rab6<sup>GTP</sup> (Matanis *et al.*,  
45 2002), which engages in the transport of Golgi-derived and secretory vesicles, and nuclear pore complex  
46 protein Nup358, which engages in transport of the cell nucleus (Splinter *et al.*, 2010). BicD2-dependent  
47 transport pathways are important for faithful chromosome segregation, neurotransmission at synapses,  
48 and essential for brain development (Baffet *et al.*, 2015; Hu *et al.*, 2013; Splinter *et al.*, 2010). Mutations  
49 of BicD2 cause the neuromuscular disease spinal muscular atrophy (Martinez-Carrera & Wirth, 2015;  
50 Peeters *et al.*, 2013; Synofzik *et al.*, 2014). Cargo selection for BicD2-dependent transport is regulated by  
51 competition of cargo-adaptors (Noell *et al.*, 2018), as well as the G2 phase specific kinase Cyclin-  
52 dependent kinase 1 (Cdk1) (Baffet *et al.*, 2015), however, additional regulatory mechanisms remain to be  
53 identified in order to explain how BicD2 switches from selecting Rab6-positive vesicles for transport in  
54 G1/S phase to recruiting dynein to the cell nucleus via Nup358 in G2 phase.

55 Cargo adaptors bind to the C-terminal domain (CTD) of *Dm BicD* (Hoogenraad *et al.*, 2001), and the  
56 structure of the *Dm BicD*-CTD (Liu *et al.*, 2013) as well as its homologs *Hs BicD2* (Noell *et al.*, 2019)  
57 and mouse (*Ms*) BicD1 (Terawaki *et al.*, 2015) were determined, which all form homodimeric coiled-  
58 coils. Interestingly, *Hs BicD2* and *Ms BicD1* form a conformation with homotypic coiled-coil registry, in  
59 which the helices are aligned at equal height and the same residues from both chains engage in layers of  
60 knobs-into-holes interactions (Noell *et al.*, 2019; Terawaki *et al.*, 2015). In contrast, *Dm BicD* has an  
61 asymmetric coiled-coil registry. In the N-terminal half of the CTD, the helices are vertically shifted by ~1  
62 helical turn respective to each other (heterotypic coiled-coil registry), whereas in the C-terminal half, the  
63 chains are aligned in a homotypic coiled-coil registry (Liu *et al.*, 2013). Coiled-coil registry shifts have so

64 far only been reported for a few proteins, including dynein (Carter *et al.*, 2008; Choi *et al.*, 2011;  
65 Croasdale *et al.*, 2011; Gibbons *et al.*, 2005; Kon *et al.*, 2009; Macheboeuf *et al.*, 2011; Noell *et al.*, 2019;  
66 Snoberger *et al.*, 2018; Stathopoulos *et al.*, 2013; Xi *et al.*, 2012), but may potentially be an inherent  
67 property of many coiled-coil structures with important physiological functions. In the case of BicD2, a  
68 coiled-coil registry shift may relieve auto-inhibition.

69 We recently used molecular dynamics (MD) simulations to probe structural dynamics in the BicD2-  
70 CTD coiled-coil (Noell *et al.*, 2019). These simulations support the idea that BicD2 can adopt both a  
71 homotypic coiled-coil registry, and an asymmetric registry, as both states are similarly stable in  
72 simulations and defined by distinct conformations of F743 and F750, which stabilize either a homotypic  
73 or asymmetric coiled-coil registry (Noell *et al.*, 2019). Notably, mutation of F743 to Ile (F684I in *Dm*)  
74 increases dynein recruitment in the *Drosophila* homolog compared to the wild type (Liu *et al.*, 2013). In  
75 our MD simulations of the F743I mutant of *Hs* BicD2-CTD, a spontaneous coiled-coil registry shift from  
76 asymmetric to fully heterotypic coiled-coil registry was observed (Noell *et al.*, 2019). We thus  
77 hypothesized that a coiled-coil registry shift upon cargo binding could relieve BicD-auto-inhibition and  
78 activate it for dynein recruitment, as has also been proposed earlier (Liu *et al.*, 2013; Noell *et al.*, 2019;  
79 Terawaki *et al.*, 2015). In addition, in MD simulations of the R747C human disease mutant of *Hs* BicD2-  
80 CTD which causes spinal muscular atrophy, a spontaneous transient coiled-coil registry shift was  
81 observed, which may be an underlying cause of the disease (Noell *et al.*, 2019).

82 Here we show that the Bicaudal mutation F684I abolishes auto-inhibition and allows cargo-  
83 independent activation of dynein motility. To investigate the structural basis for this activation, we  
84 determined the X-ray structure of the C-terminal cargo-binding domain (CTD) of *Dm* BicD-CTD/F684I,  
85 which has a homotypic coiled-coil registry, in contrast to the wild-type. Furthermore, in the structure of  
86 the mutant, the region N-terminal of F684I is disordered for one chain. This structural flexibility is  
87 confirmed by MD simulations, in which the mutant transitions back and forth between homotypic and  
88 asymmetric registries on a time scale of tens of ns. Free energy calculations indicate conformations with  
89 homotypic and asymmetric registries to have similar stability. Our data suggest that the mutation  
90 promotes a registry shift and renders the coiled-coil flexible, likely resulting in the formation of multiple  
91 conformations.

## 92 93 RESULTS

### 94 95 **Full-length *Dm* BicD with the F684I mutation recruits dynein in the absence of cargo.**

96 A single molecule TIRF (Total Internal Reflection Fluorescence) microscopy processivity assay was  
97 used to assess the functional properties of reconstituted dynein-dynactin-BicD (DDB) complexes.  
98 Complexes were reconstituted with either full-length *Dm* BicD (BicD<sup>WT</sup>), full-length *Dm* BicD/F684I  
99 (BicD<sup>F684I</sup>), or the truncated N-terminal fragment of *Dm* BicD (BicD<sup>CC1</sup>). The molar ratio of dynein-  
100 dynactin:BicD was 1:1:2 to ensure recruitment of only 1 dynein to the ternary complex (Sladewski *et al.*,  
101 2018). Full-length WT *Dm* BicD is auto-inhibited and does not recruit dynein-dynactin, while the  
102 truncated N-terminal fragment fully activates dynein-dynactin for processive transport (McClintock *et al.*,  
103 2018; McKenney *et al.*, 2014; Schlager, Hoang, *et al.*, 2014; Sladewski *et al.*, 2018). Consistent with  
104 previous results (Sladewski *et al.*, 2018), we did not observe processive directional movement for DDB<sup>WT</sup>  
105 on microtubule tracks, although some one-dimensional diffusive events of the Qdot-labeled dynein were  
106 observed. Because DDB<sup>WT</sup> showed no directional motion (Movie S1), speed and run length were not  
107 measured. In contrast, DDB<sup>CC1</sup> showed robust processivity, which was indistinguishable from that  
108 observed with DDB<sup>F684I</sup> (Fig. 1A,B, Movie S2 and S3). The speeds of both DDB<sup>CC1</sup> and DDB<sup>F684I</sup> were  
109 fitted with a single Gaussian (Fig. 1C). The DDB<sup>F684I</sup> complex moved at a speed of  $0.43 \pm 0.17 \mu\text{m/s}$   
110 ( $n=68$ ), which was not significantly different ( $p=0.44$ ) from what was observed for DDB<sup>CC1</sup> ( $0.41 \pm 0.21$   
111  $\mu\text{m/s}$ ,  $n=58$ ). Processive run-lengths were fitted with a standard exponential decay equation ( $y = Ae^{-bx}$ ),  
112 where  $A$  is the amplitude and  $1/b$  is run length. The run length of DDB<sup>F684I</sup> ( $3.3 \pm 0.18 \mu\text{m}$ ,  $n=68$ ) was  
113 not significantly different ( $p=0.9$ ) from that of DDB<sup>CC1</sup> ( $2.8 \pm 0.13 \mu\text{m}$ ,  $n=58$ ) (Fig. 1D).

114 Based on run frequency, speed and processive run length, we conclude that the full-length mutant *Dm*  
115 BicD<sup>F684I</sup> was not auto-inhibited and was fully capable of binding and activating dynein-dynactin for  
116 processive transport in the absence of cargo.

117  
118 ***Crystal structure of the Dm BicD-CTD/F684I mutant provides mechanistic insights into cargo-***  
119 ***independent activation.***

120 To gain structural insights into the molecular mechanism of activation of BicD, we determined the  
121 structure of the C-terminal domain of the *Drosophila melanogaster* BicD/F684I mutant (*Dm* BicD-  
122 CTD/F684I, residues 656-745). Crystals were obtained in the space group  $P3_1 2 1$ . The structure was  
123 determined by molecular replacement in the PHENIX suite (Adams *et al.*, 2010), using coordinates from  
124 the wild-type structure (Liu *et al.*, 2013) that were truncated N-terminal of residue 692 as the search  
125 model. The structure was refined to 2.35Å resolution, with an  $R_{\text{free}}$  of 25.99% and an  $R_{\text{work}}$  of 25.06%  
126 (Table 1). In the structure, *Dm* BicD-CTD/F684I forms a homodimeric coiled-coil. However, in contrast  
127 to the structure of the wild type, in the structure of the Bicaudal mutant, a ~20 residue N-terminal region  
128 upstream of the mutated residue I684 is not resolved in the electron density map for one chain of the  
129 dimer (Fig. 2). However, the same region is well defined in the electron density map for the second chain.  
130 Consequently, the model contains residues 666-740 and 684-741 for the two chains, respectively.

131 Coiled-coils such as *Dm* BicD-CTD are characterized by heptad repeats ‘abcdefg’ in the sequence,  
132 where residues at ‘a’ and ‘d’ positions are predominantly hydrophobic. These residues form  
133 characteristic “knobs-into-holes interactions”, where a knob from one chain (either an ‘a’ or ‘d’ position  
134 residue) fits into a hole formed of four residues on the opposite chain (Crick, 1953; O’Shea *et al.*, 1991).  
135 Notably, structures of distinct BicD homologs with distinct coiled-coil registries have been determined.  
136 *Hs* BicD2-CTD has a homotypic coiled-coil registry, with characteristic layers of knobs-into-holes  
137 interactions, which are formed by the same knob residues from both chains, and therefore the helices are  
138 aligned at equal height. Wild-type *Dm* BicD-CTD (Fig. 2A) however has an asymmetric coiled-coil  
139 registry. The N-terminal half of the coiled-coil has a heterotypic registry, in which residue *i* from one  
140 chain is paired up with residue *i*+4 from the second chain to form layers of knobs-into-holes interactions,  
141 resulting in a vertical displacement of the helices by ~one helical turn. In the C-terminal half, the helices  
142 are aligned to form a coiled-coil with homotypic registry.

143 To determine the coiled-coil registry, we assigned the heptad register of the structure of *Dm* BicD-  
144 CTD/F684I (Fig. 2, Fig. S1). As observed for the wild-type *Dm* BicD-CTD (Fig. 2A) and *Hs* BicD2-CTD  
145 (Fig. 2C), the C-terminal half of the mutant structure has a homotypic coiled-coil registry (Fig. 2B, see  
146 Table 2 for residue numbering in *Hs* and *Dm* homologs). Notably, one additional layer of knobs-into-  
147 holes interactions with homotypic coiled-coil registry was identified in the Bicaudal mutant compared to  
148 the *Dm* BicD wild type. This layer is formed by knob residue V702 from both chains (Fig. 2, Fig. S1). In  
149 contrast to the F684I mutant, in the *Dm* BicD wild type, V702 forms a layer of knobs-into-holes  
150 interactions with residue Y698 and therefore part of the region that has a heterotypic coiled-coil registry.  
151 Wild-type *Dm* BicD-CTD also has additional layers of knob-into-holes interactions with heterotypic  
152 registry in its N-terminal region, resulting in a vertical displacement of the helices by approximately one  
153 helical turn. However, no additional layers of knobs-into-holes interactions N-terminal of V702 were  
154 identified in the structure of *Dm* BicD-CTD/F684I, because a ~20 residue region upstream of residue I684  
155 is not resolved for one chain (Fig. 2).

156 A least-squares superimposition of the structures of the *Dm* BicD-CTD/F684I mutant and the wild  
157 type revealed that in the mutant, both I684 residues are aligned at equal height, as observed for the  
158 homologous residue F743 in *Hs* BicD2 with homotypic registry (Fig. 2 D-G). However, in the wild-type  
159 *Dm* BicD structure, which has an asymmetric coiled-coil registry, residues F684 from both chains are  
160 vertically shifted by approximately one helical turn with respect to each other (Fig. 2 D-G). F684 from  
161 one chain lines up with R688 from the second chain to form a layer of knobs-into-holes interactions  
162 (heterotypic registry) (Fig. 2A).

163 To conclude, several pieces of data suggest that the structure of the *Dm* BicD2-CTD/F684I mutant has  
164 a homotypic coiled-coil registry: One additional layer of knobs-into-holes interactions with homotypic

165 coiled-coil registry is formed by residues V702 in the structure of the Bicaudal mutant compared to the  
166 wild type. Furthermore, residues I684 are aligned in the structure of the Bicaudal mutant at equal height  
167 (homotypic registry), whereas in the wild-type structure, residues F684 are vertically shifted respectively  
168 to each other by approximately one helical turn (heterotypic registry). However, since a ~20 residue area  
169 of one monomer in the Bicaudal mutant is not resolved, no additional knobs-into-holes interactions were  
170 identified, therefore, the coiled-coil registry N-terminal of I684 is unknown.

171

### 172 ***Distinct conformations of F684 and F691 stabilize distinct coiled-coil registries.***

173 Another key residue that is important to stabilize either a homotypic or asymmetric coiled-coil registry  
174 is F691 (Fig. 3). In the *Dm* BicD-CTD wild-type structure with the asymmetric coiled-coil registry,  
175 phenylalanine side chains of F691 from both chains interact in a face-to-edge aromatic interaction, which  
176 leads to vertical displacement of the chains by ~1 helical turn (Fig. 3B). However, in the BicD homologs  
177 with homotypic registry (*Ms* BicD1, *Hs* BicD2) the homologous phenylalanine residues interact with  
178 face-to-face aromatic interaction, which allows the chains to be aligned in the homotypic registry (Fig.  
179 3D, E). In the *Dm* BicD F684I mutant, the phenylalanine side chains of F691 from both chains interact  
180 face-to-face (Fig. 3A, C, F), which suggests a homotypic registry. A least-squares superimposition of the  
181 structures of the *Dm* BicD wild type and the F684I mutant confirms that the F691 side chains form a face-  
182 to-face aromatic interaction in the structure of the Bicaudal mutant and a face-to-edge aromatic  
183 interaction in the wild-type structure with the asymmetric registry (Fig. 3C). These data suggest that in the  
184 structure of the *Dm* BicD F684I mutant, the F691 residues assume a conformation that is found in *Hs*  
185 BicD2 with homotypic coiled-coil registry.

186

### 187 ***The disordered region is present in the crystal, and $\alpha$ -helical.***

188 Because a ~20 residue region of one chain is not resolved in the crystal structure, we dissolved crystals  
189 of *Dm* BicD-CTD/F684I and analyzed them by SDS-PAGE, to assess whether the crystals contained the  
190 intact protein (Fig. 4A). A comparison of the SDS-PAGE of the dissolved crystals, the purified *Dm* BicD-  
191 CTD/F684I protein as well as the wild-type protein suggests that indeed the intact *Dm* BicD-CTD/F684I  
192 protein is present in crystal, suggesting that the unresolved N-terminal region is disordered.

193 In order to assess, whether the disordered portion of the helix is  $\alpha$ -helical (rather than misfolded), we  
194 probed the secondary structure content of *Dm* BicD-CTD/F684I by circular dichroism (CD) wavelength  
195 scans. The CD wavelength spectra of the *Dm* BicD-CTD/F684I mutant and the wild-type both have  
196 minima at 208nm and 222nm, which are characteristic for  $\alpha$ -helical proteins. Notably, the spectra of the  
197 F684I mutant and the wild-type overlay perfectly, suggesting that both structures have a very similar  $\alpha$ -  
198 helical content. These data suggest that the ~20 residue disordered region is  $\alpha$ -helical rather than  
199 unstructured (Fig. 4B). In order to assess, whether differences in the crystallization conditions of the *Dm*  
200 BicD-CTD/F684I mutant and the wild-type protein contributed to the observed structural differences, we  
201 also recorded CD wavelength spectra in modified crystallization buffers (Fig. S2). These spectra  
202 confirmed that the compounds of the crystallization buffers do not affect the  $\alpha$ -helical content of either  
203 the mutant or the wild-type protein, and therefore do not cause the observed structural disorder in the  
204 mutant.

205 Furthermore, we compared the dimer interface of the structure of the F684I mutant with the wild type  
206 (Table S1). Since the N-terminal region of one of two chains is disordered in the mutant, the interface  
207 area is smaller (1427 Å<sup>2</sup>) compared to the wild type (1764 Å<sup>2</sup>), and the dimer interface of the F684I  
208 mutant contains eighteen fewer interacting residues as well as one less hydrogen bond and one less salt  
209 bridge compared to the wild type (Table S1). It is unknown if the disordered region engages in  
210 interactions that stabilize the dimer, however, in the absence of additional interactions one would expect  
211 that the F684I mutant would be less stable than the wild type.

212 Thus, we probed thermodynamic stability of the F684I mutant and the wild type by recording circular  
213 dichroism spectroscopy melting curves (Fig. 4C). Protein unfolding was monitored by CD spectroscopy  
214 at 222 nm. The apparent melting temperature  $T_M$  of *Dm* BicD-CTD/F684I was 45.4±1.6°C, which is  
215 similar to the  $T_M$  of the wild-type protein (44.0±1.8°C) (Fig. 4C). Based on the melting temperatures, the

216 *Dm* BicD-CTD/F684I mutant has comparable thermodynamic stability as the wild type, despite the N-  
217 terminal disordered portion of one helix. Therefore, it is conceivable that the disordered portion still  
218 interacts with the other chain, as it would explain the observed similar thermodynamic stability.

219 To conclude, the ~20 residue disordered region is present in the crystal and folded, and since the  
220 thermodynamic stability of the mutant is comparable to the wild type, this region is likely to still interact  
221 with the other chain. These data suggest that the region N-terminal of I684 is flexible in the mutant in one  
222 chain and possibly assuming multiple conformations.

223  
224 ***MD simulations suggest that the N-terminal region of the mutant can switch between homotypic and***  
225 ***heterotypic registries.***

226 In the X-ray structure, the Bicaudal mutant of *Dm* BicD-CTD assumes a conformation with a homotypic  
227 coiled-coil registry, and the region N-terminal of F684I is disordered for one of two chains. In order to  
228 gain insight into the disorder in the N-terminal region of *Dm* BicD-CTD/F684I, we used MD simulations  
229 to assess if a conformation of the mutant with a homotypic registry would sample multiple conformations.  
230 For these simulations, the structure of the homolog *Hs* BicD2-CTD was chosen as a starting point, since it  
231 has a fully resolved homotypic coiled-coil registry (unlike *Dm* BicD WT), and amino acid mutations were  
232 carried out to match the sequence of *Dm* BicD-CTD/F684I. In these simulations, the N-terminal region of  
233 the coiled-coil switched back and forth between a homotypic and heterotypic registry, while the C-  
234 terminal region retained a homotypic registry, in line with the various crystal structures. Therefore, the  
235 overall coiled-coil registry of *Dm* BicD-CTD/F684I switched after ~53 ns from homotypic to asymmetric,  
236 and reverted back to homotypic after ~120 ns (Fig. 5A-C). This suggests that the disorder in the N-  
237 terminal region of one of the chains, as seen in the crystal structure, is likely caused by the ability of the  
238 N-terminal region to easily switch between the homotypic and heterotypic registries.

239 In order to gain insights into the kinetics of the observed coiled-coil registry shift, we also calculated  
240 the relative free energies of the conformations with homotypic and asymmetric coiled-coiled registries, as  
241 well as the free energy barrier that separates them. Detailed analysis of the MD trajectory for *Dm* BicD-  
242 CTD/F684I revealed the C-C<sub>α</sub>-C<sub>β</sub>-C<sub>γ</sub> dihedral angle of F691 of chain A to be directly correlated with the  
243 registry shift. It assumed values around 175° and around 55° in conformations with homotypic and  
244 asymmetric registries, respectively. Interestingly, the corresponding dihedral angle of F691 of chain B  
245 and of I684 and Y698 of either chain were not found to be correlated with the registry shift. The different  
246 behaviors of F691 of the two chains is consistent with the disorder in the N-terminal region of only one of  
247 the chains in the crystal structure. In addition to the above mentioned dihedral angle, the salt-bridge  
248 interaction between K678 of chain A and E673 of chain B that is formed in the conformation with the  
249 homotypic registry was also found to be correlated with the registry shift, with the interaction completely  
250 broken in the conformation with asymmetric registry. Interestingly, of all the salt-bridges in the N-  
251 terminal region, only this one was found to be related to the registry shift. Our data therefore provide  
252 insights into the molecular mechanism of the coiled-coil registry shift, and reveal key roles of residue  
253 F691 from chain A as well as of the salt bridge between K678 of chain A and E673 of chain B in the  
254 mechanism.

255 The identification of these key coordinates related to registry shift allowed the calculation of the  
256 potential of mean force (PMF) or free energy as a function of the two coordinates (Eqn. 1, see Materials  
257 and Methods), revealing the free energy difference between the homotypic and asymmetric registries to  
258 be less than 1 kcal/mol, and the free energy barrier for transition between the registries to be ~4-5  
259 kcal/mol (Fig. 5D). Hence, the two registries have similar stability and can interconvert on a timescale of  
260 tens of ns, as observed in the MD simulations. In the crystal structure of *Dm* BicD-CTD WT, disorder  
261 was not observed. It is conceivable that F684 is a key residue that serves to lock the WT BicD coiled-coil  
262 in conformations with either homotypic or asymmetric registry. Replacement of this residue by isoleucine  
263 may lead to promiscuity, allowing other conformations to form. This is in line with the crystal structure of  
264 the F684I mutant and the MD simulations. It should be noted that the structure of the mutant has an  
265 elevated overall B-factor (Table 1), indicating flexibility, and a region of one chain that undergoes coiled-  
266 coil registry shifts is also disordered, further suggesting conformational variability.

267 In comparison, in our recent MD simulations of the human homolog of the Bicaudal mutant, *Hs*  
268 BicD2-CTD/F743I with asymmetric coiled-coil registry, the homologous F743I mutation induced a  
269 coiled-coil registry shift from an asymmetric to a fully heterotypic registry (Noell *et al.*, 2019).  
270 Simulations starting from the homotypic registry of *Hs* BicD2-CTD/F743I maintained a homotypic  
271 registry (Figure S3), suggesting that the human homolog of the Bicaudal mutant can also sample multiple  
272 registries. Hence conformational flexibility caused by the F684I mutation is not unique to *Dm* BicD-CTD,  
273 but also present in other homologs.

274 To conclude, our MD simulations of the Bicaudal mutant show that it samples conformations with  
275 homotypic and asymmetric coiled-coil registries which are of similar stability on a time scale of tens of ns  
276 (Fig. 5), which would explain why one chain in the N-terminal region of the coiled-coil is disordered in  
277 the crystal structure.

### 278 ***The homologous F743I mutation modulates cargo selection in Hs BicD2.***

280 Because a registry shift is expected to re-model the surface of the coiled-coil, which harbors binding  
281 sites for cargo adaptors, we investigated whether a coiled-coil registry shift in BicD2 plays a role in cargo  
282 selection. The binding sites for the cargo adaptors *Dm* Egalitarian and *Dm* Rab6<sup>GTP</sup> on *Dm* BicD have  
283 been previously mapped to residues 702-743 (Fig. 6A) (Liu *et al.*, 2013; Terawaki *et al.*, 2015). A similar  
284 region has been mapped as minimal Rab6<sup>GTP</sup> binding site for a close homolog of human BicD2 (residues  
285 755-802, Fig. 6B, see Table 2 for residue numbering in *Dm* and *Hs* homologs). These cargo adaptors bind  
286 to the C-terminal homotypic region of *Dm* BicD-CTD/ *Hs* BicD2-CTD, which does not undergo coiled-  
287 coil registry shifts. Therefore the F684I mutation, which likely induces a coiled-coil registry shift, and  
288 which is located N-terminal of the mapped binding sites, is not expected to alter cargo adaptor binding.  
289 Indeed, the F684I mutant of *Drosophila* BicD does not affect the interaction of BicD with the cargo  
290 adaptors Egalitarian and Rab6<sup>GTP</sup> (Liu *et al.*, 2013).

291 Notably, the mammalian cargo adaptor Nup358 binds to a larger region that includes residues 724-802  
292 of *Hs* BicD2 (mapped for a homolog) (Terawaki *et al.*, 2015), and a portion of this region undergoes a  
293 coiled-coil registry shift (Fig. 6B). Several important Nup358 interface residues, which are N-terminal of  
294 F743 were identified for a close homolog of human BicD2 (Table 2; residues L746, R747, M749 and  
295 R753). Mutation of each of these residues to alanine strongly diminishes the interaction (Terawaki *et al.*,  
296 2015).

297 We therefore hypothesized that the homologous F743I mutation in *Hs* BicD2 would modulate the  
298 interaction between BicD2 and Nup358, since a portion of the interface is located in the region that is  
299 thought to undergo coiled-coil registry shifts. The BicD2/Rab6<sup>GTP</sup> interaction however is expected to be  
300 unaffected by the F743I mutation, since the binding site is located in the region that remains homotypic.  
301 This is confirmed by pull-down assays of Rab6<sup>GTP</sup> with the BicD2-CTD/F743I mutant, and the  
302 F743I/R747C mutant, which both bind with comparable strength as observed for the wild-type (Fig. 6C).  
303 Interestingly, binding of Nup358 is modulated by the mutation. In a pull-down-assay, the minimal  
304 interacting domain Nup358-min pulls down wild-type BicD2-CTD much more strongly compared to the  
305 F743I mutant (Fig. 6C). Binding is even more strongly weakened for the double mutant F743I/R747C,  
306 which combines two mutations that induced coiled-coil registry shifts in simulations (Fig. 6C) (Noell *et*  
307 *al.*, 2019).

308 To gain further insights into the impact of the mutation on the cargo-adaptor-binding interface, we  
309 compared the electrostatic surface potential of the structures of *Dm* BicD-CTD/F684I, the wild type  
310 (asymmetric registry), and *Hs* BicD2-CTD (homotypic registry) (Fig. 6D-G). There are differences in the  
311 electrostatic surface potential in the area where Nup358 binds (L746, R747, M749 and R753 (Terawaki *et*  
312 *al.*, 2015) (Fig. 6D-G). Notably, both the Bicaudal mutant BicD-CTD/F684I and *Hs* BicD2-CTD  
313 (homotypic registry) have a highly positively charged surface electrostatic potential in the area of these  
314 interface residues, creating a basic pocket (blue, Fig. 6E,G). In comparison, the same interface area in the  
315 *Dm* BicD-CTD has a much less charged electrostatic surface potential (Fig. 6F). Such changes could be  
316 caused by a coiled-coil registry shift and could be responsible for the observed difference for the  
317 interaction between *Hs* BicD2-CTD wild type and the F743I mutant with Nup358-min.



318 To conclude, while the *Dm* BicD/F684I mutant shows comparable selectivity as the wild-type protein  
319 towards the cargo adaptors Egalitarian and Rab6<sup>GTP</sup> (Liu *et al.*, 2013), in human BicD2, the homologous  
320 F743I mutant, which likely induces a coiled-coil registry shift, affects cargo selection. While binding of  
321 BicD2 to Rab6<sup>GTP</sup> is not affected by the mutation, binding to Nup358 is strongly reduced, likely because  
322 it binds to a larger binding site that contains a portion of the protein that may undergo a coiled-coil  
323 registry shift.

## 324 325 **DISCUSSION**

326 In the absence of cargo, BicD forms an auto-inhibited state that is unable to recruit dynein  
327 (Chowdhury *et al.*, 2015; Liu *et al.*, 2013; McClintock *et al.*, 2018; McKenney *et al.*, 2014; Schlager,  
328 Hoang, *et al.*, 2014; Schlager, Serra-Marques, *et al.*, 2014; Sladewski *et al.*, 2018; Splinter *et al.*, 2012;  
329 Terawaki *et al.*, 2015; Urnavicius *et al.*, 2015). Here we show by single molecule processivity assays that  
330 auto-inhibition is abolished in the classical Bicaudal mutant BicD/F684I, resulting in cargo-independent  
331 activation of dynein-dynactin, consistent with cellular studies that show increased dynein recruitment (Liu  
332 *et al.*, 2013; Mohler & Wieschaus, 1986). To probe the mechanism of BicD activation from the auto-  
333 inhibited state, we determined the X-ray structure of the C-terminal cargo-binding domain of the Bicaudal  
334 mutant (*Dm* BicD-CTD/F684I). The Bicaudal mutant assumes a conformation with homotypic registry as  
335 its predominant structural state, as the helices are aligned at equal height up to residue I684, unlike in the  
336 wild-type, where F684 residues are displaced vertically by one helical turn against each other. However, a  
337 ~20 residue region upstream of residue I684 is not resolved for one chain in the structure. This structural  
338 flexibility is also confirmed by MD simulations and free energy calculations, in which the mutant samples  
339 conformations with homotypic and asymmetric coiled-coil registries of similar stability on a time scale of  
340 tens of ns, which would explain the observed disorder in the crystal structure. Our data suggest that the  
341 F684I mutation shifts the equilibrium of registry-shifted conformers, resulting in formation of a larger  
342 percentage of BicD with homotypic registry.

343 It was previously proposed that BicD undergoes coiled-coil registry shifts, which activate it for dynein  
344 recruitment upon cargo binding (Liu *et al.*, 2013; Noell *et al.*, 2019; Terawaki *et al.*, 2015). This idea is  
345 based on the structures of distinct BicD homologs with distinct coiled-coil registries as well as our recent  
346 MD simulations, which suggest that human BicD2 can assume stable conformations with either  
347 homotypic or asymmetric coiled-coil registries (Liu *et al.*, 2013; Noell *et al.*, 2019; Terawaki *et al.*,  
348 2015).

349 Here, we show that in MD simulations, the structure of the *Dm* BicD/F684I mutant transitions back  
350 and forth between homotypic and asymmetric coiled-coil registries on a time scale of tens of ns. These  
351 simulations also reveal key roles of residue F691 from chain A as well as for the salt bridge between  
352 K678 of chain A and E673 of chain B in the structural transition. Our results suggest that the mutation  
353 induces structural dynamicity, and leads to formation of multiple conformations, which is also supported  
354 by the crystal structure. The structure has a comparatively high B-factor, suggesting flexibility and a ~20  
355 amino acid region at the N-terminus of one chain is not resolved in the structure, whereas the second  
356 chain is resolved, and therefore the coiled-coil registry in this region cannot be determined. It is unlikely  
357 that the different crystallization conditions contribute to the distinct conformations of the coiled-coil,  
358 since the mutant and wild-type protein have the same  $\alpha$ -helical content in different crystallization buffers.  
359 Our data suggest that the disordered region is present in the crystal and  $\alpha$ -helical. The disordered region  
360 likely also still interacts with the second ordered chain, since the melting temperatures in solution studies  
361 indicate similar thermodynamic stability for the mutant and the wild-type.

362 In the wild-type, F684 likely serves as a switch to lock *Dm* BicD in conformations with distinct  
363 registries (Liu *et al.*, 2013; Noell *et al.*, 2019). In the conformation with the asymmetric registry, F684  
364 rotates to the core of the coiled-coil and forms an edge-to-face aromatic interaction with residue F684  
365 from the second chain, which leads to the observed vertical displacement of the helices (Liu *et al.*, 2013;  
366 Noell *et al.*, 2019). In the mutant, the phenylalanine side chain is replaced by a much smaller isoleucine  
367 side chain, which likely cannot lock the asymmetric registry in place, and due to its smaller size is unable  
368 to prevent conformational changes. The result is likely a dynamic mixture of several states.

369 The single molecule assays, which use full-length mutant BicD, are consistent with the predictions  
370 derived from the minimal cargo-binding domain structure. In the auto-inhibited conformation, full-length  
371 BicD2 forms a looped structure in which the CTD binds to the N-terminal dynein/dynactin binding site,  
372 likely causing steric interference (Chowdhury *et al.*, 2015; Liu *et al.*, 2013; McClintock *et al.*, 2018;  
373 McKenney *et al.*, 2014; Schlager, Hoang, *et al.*, 2014; Schlager, Serra-Marques, *et al.*, 2014; Sladewski *et al.*  
374 *et al.*, 2018; Splinter *et al.*, 2012; Terawaki *et al.*, 2015; Urnavicius *et al.*, 2015). Cargo binding could  
375 induce a local coiled-coil registry shift in the BicD2-CTD, which might be sufficient to weaken binding to  
376 the N-terminal dynein/dynactin binding site and thus activate BicD for dynein recruitment. Alternatively,  
377 the registry shift could propagate through the entire coiled-coil to the N-terminal dynein-dynactin binding  
378 site. Furthermore, the induced flexibility and formation of multiple conformations as observed in the  
379 mutant may potentially also be an inherent structural feature of cargo-bound wild type BicD. Such  
380 structural and mechanistic details remain to be established and studies with full-length proteins in  
381 physiological context remain to be conducted to fully understand the molecular mechanism of BicD2  
382 auto-inhibition and activation.

383 In addition to BicD2, several other dynein adaptors have coiled-coil structures (e.g. NudE/NudEL  
384 (Efimov & Morris, 2000; Niethammer *et al.*, 2000; Stehman *et al.*, 2007), the Hook proteins (Bielska *et al.*  
385 *et al.*, 2014; Olenick *et al.*, 2019), RILP (Cantalupo *et al.*, 2001), Rab11-FIP3 and Spindly (Griffis *et al.*,  
386 2007; Mosalaganti *et al.*, 2017) and some of them, e.g. Spindly assume an auto-inhibited state in the  
387 absence of cargo (McKenney *et al.*, 2014; Mosalaganti *et al.*, 2017). The molecular mechanism for auto-  
388 inhibition in these dynein adaptors remains to be established, and it is possible that some of them undergo  
389 coiled-coil registry shifts as well.

390 Cargo selection for BicD2-dependent transport events are tightly regulated, but currently known  
391 regulatory mechanisms, which include competition of cargo adaptors (Noell *et al.*, 2018) and the G2  
392 specific kinase Cdk1 (Baffet *et al.*, 2015), are insufficient to fully explain how BicD2 switches between  
393 these cargoes in a cell-cycle specific manner (Noell *et al.*, 2018).

394 In *Drosophila*, cargo adaptors Egalitarian and Rab6<sup>GTP</sup> bind to a small domain of BicD that remains  
395 homotypic and does not undergo coiled-coil registry shifts, consistent with the Bicaudal mutation not  
396 affecting cargo selection (Dienstbier *et al.*, 2009; Liu *et al.*, 2013). The F684I mutation does not affect the  
397 affinity of BicD for Egalitarian or Rab6<sup>GTP</sup> (Liu *et al.*, 2013) but it promotes cargo-independent dynein  
398 recruitment (Fig. 1) thereby resulting in increased transport rates. An increase in dynein-mediated  
399 transport of *Oskar* mRNA/Egalitarian in the F684I mutant causes the double-abdomen fly phenotype  
400 (Bull, 1966; Liu *et al.*, 2013; Mach & Lehmann, 1997; Mohler & Wieschaus, 1986; Navarro *et al.*, 2004;  
401 Zimyanin *et al.*, 2008). This likely means that dynein recruitment is more limiting to transport than the  
402 affinity of BicD towards cargo adaptors (Bullock *et al.*, 2006; Liu *et al.*, 2013).

403 Notably, we propose that coiled-coil registry shifts in human BicD2 modulate cargo selection. Human  
404 Nup358 binds to a larger interface on BicD2 that includes a region which undergoes coiled-coil registry  
405 shift (Terawaki *et al.*, 2015). The homologous F743I mutation which is expected to induce a coiled-coil  
406 registry shift (Noell *et al.*, 2019) diminishes binding of Nup358 to *Hs* BicD2, whereas the interaction of  
407 BicD2 with Rab6<sup>GTP</sup> is unaffected. Binding of cargo-adaptors such as Nup358 is expected to induce a  
408 coiled-coil registry shift in BicD2, and in our binding assays, Nup358 remains associated with BicD2. It  
409 remains to be established by future studies, if this is due to a slow dissociation constant of the complex or  
410 whether the interaction with BicD2 induces structural changes in Nup358 that stabilize it in the complex  
411 once bound (“induced fit”). Notably, a registry shift could have a regulatory role in preventing the cargo  
412 adaptor Nup358 from binding. A coiled-coil registry shift in BicD2 could be triggered by a regulatory  
413 signal, which could modulate cargo selection by reducing the binding of selected cargo adaptors including  
414 Nup358.

415 In conclusion, our data provide mechanistic insights into auto-inhibition and cargo selection of the  
416 dynein adaptor BicD2. Our results suggest that the full-length *Dm* BicD/F684I mutant is capable of  
417 activating dynein for processive transport in a cargo-independent manner. The X-ray structure of *Dm*  
418 BicD-CTD/F684I reveals that the mutation induces a coiled-coil registry shift, which we propose as the  
419 underlying mechanism for cargo-independent activation. A ~20 residue N-terminal region of one

420 monomer is disordered in the structure, in line with MD simulations of the mutant which samples  
421 conformations with homotypic and asymmetric registries on a time scale of tens of ns. Free energy  
422 calculations indicate that conformations with homotypic and asymmetric registries have similar stability  
423 and are separated by a free energy barrier of ~4-5 kcal/mol. The observed structural dynamicity could  
424 either be a structural feature of activated BicD2 or it could be caused by the mutation. Notably, the human  
425 homolog of the Bicaudal mutant shows reduced affinity to the cargo adaptor Nup358, which recruits  
426 BicD2 to the nuclear envelope. We thus propose that a coiled-coil registry shift modulates cargo selection  
427 for BicD2-dependent transport pathways, which are important for cell cycle control and brain  
428 development (Baffet *et al.*, 2015; Bianco *et al.*, 2010; Dienstbier *et al.*, 2009; Hu *et al.*, 2013; Matanis *et*  
429 *al.*, 2002; Splinter *et al.*, 2010).

430

## 431 MATERIALS AND METHODS

432

### 433 Protein expression and purification

434 Codon optimized human dynein for expression in Sf9 cells (DYNC1H1 (DHC), DYNC1I2 (DIC),  
435 DYNC1LI2 (DLIC), DYNLT1 (Tctex), DYNLRB1 (Robl) and DYNLL1(LC8)) was a generous gift from  
436 Simon Bullock (Schlager, Hoang, *et al.*, 2014). The heavy chain was modified to contain an N-terminal  
437 FLAG tag followed by a biotin tag to enable heavy chain labeling. Dynein expression in Sf9 cells and  
438 purification was as described in (Sladewski *et al.*, 2018). Purified dynein was stored at -20°C in 10 mM  
439 imidazole, pH 7.4, 0.2 M NaCl, 1 mM EGTA, 2 mM DTT, 10 µM MgATP, 5 µg/ml leupeptin, 50%  
440 glycerol. Dynactin was purified from ~300 g bovine brain tissue as described (Bingham *et al.*, 1998), and  
441 stored at -20°C in the same buffer as dynein. Full-length WT and mutant *Drosophila* BicD (BicD<sup>WT</sup> and  
442 BicD<sup>F684I</sup>) were expressed in Sf9 cells and *Drosophila* BicD-coiled-coil domain 1 (BicD<sup>CC1</sup>) in bacteria as  
443 described (11).

444 To create an expression construct of *Drosophila* BicD-CTD/F684I (residues 656-745), the  
445 corresponding codon optimized DNA sequence was commercially synthesized by Genscript and cloned  
446 into the pET28a vector with the NdeI and XhoI restriction sites. *Drosophila* Bicaudal D-CTD F684I (*Dm*  
447 BicD-CTD F684I, residues 656-745) was expressed in *E. coli* BL20(DE3)-RIL strain. His<sub>6</sub>-tagged *Dm*  
448 BicD-CTD/F684I was purified by Ni-NTA affinity chromatography and the tag was cleaved by thrombin,  
449 followed by second Ni-NTA affinity chromatography as described in (Noell *et al.*, 2018). The protein was  
450 further purified by gel filtration chromatography on a HiLoad™ 16/600 Superdex 200 pg column (GE  
451 Healthcare) with the following buffer: 20 mM HEPES pH 7.5, 150 mM NaCl, 0.5 mM TCEP as described  
452 (Noell *et al.*, 2018). Wild-type *Dm* BicD-CTD was expressed and purified as described (Cui *et al.*, 2018;  
453 Loftus *et al.*, 2017; Noell *et al.*, 2019). Purified protein was analyzed by SDS-PAGE, 16% acrylamide  
454 gels and stained by Coomassie Blue.

455 GST-pull down assays of Rab6<sup>GTP</sup>-GST, Nup358-min-GST and *Hs* BicD2-CTD wild type as well as  
456 the mutants F743I and F743I/R747C were performed as described (Noell *et al.*, 2019). For the assays,  
457 His<sub>6</sub>-tagged *Hs* BicD2-CTD fragments (wild type and mutants) were purified as described by a single  
458 affinity chromatography step from 1L of cell culture, whereas Rab6<sup>GTP</sup>-GST and Nup358-min-GST were  
459 purified from 0.5L of cell culture. (Noell *et al.*, 2019). For GST-pull-down with Nup358-min, human  
460 Nup358 (residues 2147-2240) was purified by glutathione sepharose as described (Noell *et al.*, 2019) but  
461 not eluted. We then proceeded with the same protocol as described for the Rab6<sup>GTP</sup> GST-pull-down  
462 (Noell *et al.*, 2019), however, GTP was omitted.

463

### 464 Crystallization

465 Purified *Dm* BicD-CTD/F684I was set up for crystallization at 20°C in hanging drops. For the drop, 1 µl  
466 of the protein sample at a concentration of 8 mg/ml was mixed with 1 µl of reservoir buffer (4% PEG  
467 3350, 0.4 M NaSCN, 5% glycerol). Crystals in space group *P*3<sub>1</sub>21 were obtained after 2-3 days in the  
468 dimensions 0.2 mm \* 0.2 mm \* 0.2 mm. Crystals were soaked in a cryo-buffer consisting of the reservoir  
469 solution with addition of 30% glycerol and 10 mM HEPES pH 7.5 and flash frozen in the liquid nitrogen.

470

## 471 **Structure determination**

472 Data was collected from a single crystal at NE-CAT beam line 24ID-C at the Advanced Photon Source  
473 (APS), Argonne National Lab (ANL), which was equipped with a Pilatus 6M detector. X-ray intensities  
474 were processed and scaled using the RAPD software developed by F. Murphy, D. Neau, K. Perry and S.  
475 Banerjee, APS (<https://rapd.nec.aps.anl.gov/login/login.html>). The structure was determined by molecular  
476 replacement in the PHENIX suite (Adams *et al.*, 2010), with the structure of the wild-type as the search  
477 model, which was truncated N-terminal of residue 692 (Liu *et al.*, 2013). An initial model was obtained  
478 from automatic model building in the PHENIX suite and completed by manual model building in the  
479 program COOT (Adams *et al.*, 2010; Emsley *et al.*, 2010). The structure was refined through iterative  
480 cycles of manual model building and refinement (Adams *et al.*, 2010; Emsley *et al.*, 2010) to 2.35Å  
481 resolution in the PHENIX suite (Adams *et al.*, 2010), with an  $R_{\text{free}}$  of 25.99% and an  $R_{\text{work}}$  of 25.06%  
482 (Table 1). The stereochemical quality of the model was assessed with MolProbity (Chen *et al.*, 2010). The  
483 crystallographic statistics are summarized in Table 1.

## 484 **Structural analysis**

486 Structures were compared by least-squares superimposition of the coordinates in COOT (Emsley *et al.*,  
487 2010). Dimer interfaces and knobs-into-holes interactions were analyzed by the web servers PISA and  
488 SOCKET, respectively (Krissinel & Henrick, 2007; Walshaw & Woolfson, 2001). For identification of  
489 knobs-into-hole interactions, a cutoff of 7.5 Å was used (helix extension 1 residue). Figures were created  
490 in the PyMOL Molecular Graphics System, Version 2.0 (Schrödinger, LLC) and VMD (Humphrey *et al.*,  
491 1996). The program APBS was used to analyze surface electrostatic potentials of proteins (Jurrus *et al.*,  
492 2018). Default parameters were used; neutral charges were assigned to the N- and C-termini, waters were  
493 removed and selenomethionine residues were converted to methionine.

## 494 **Single molecule processivity assays with full-length *Dm* BicD**

496 Dynein, dynactin and *Dm* BicD constructs were each diluted into 30 mM HEPES pH 7.4, 300 mM KOAc,  
497 2 mM MgOAc, 1 mM EGTA, 20 mM DTT, clarified for 20 min at 400,000 x g and the concentration  
498 determined with the Bradford reagent (Bio-Rad). To form the dynein-dynactin-BicD (DDB) complex,  
499 dynein, dynactin and BicD (WT, CC1, or F684I) were incubated at a molar ratio of 1:1:2 (200 nM dynein,  
500 200 nM dynactin and 400 nM BicD) on ice for 30 min in motility buffer (30 mM HEPES pH 7.4, 150  
501 mM KOAc, 2 mM MgOAc, 1 mM EGTA, 2 mM MgATP, 20 mM DTT, 8 mg/ml BSA, 0.5 mg/ml kappa-  
502 casein, 0.5% pluronic F68, 10 mM paclitaxel and an oxygen scavenger system (5.8 mg/ml glucose, 0.045  
503 mg/ml catalase, and 0.067 mg/ml glucose oxidase). To label the biotin-tag at the N-terminal region of the  
504 dynein heavy chain, 400 nM streptavidin-conjugated 655 quantum dots (Invitrogen) were added to the  
505 DDB complex and incubated on ice for 15 min. The DDB complex was diluted in motility buffer  
506 containing 50 mM KOAc to a final concentration of 0.5 nM dynein for observing motion on  
507 microtubules.

508 PEGylated slides were coated with 0.3 mg/ml rigor kinesin for attachment of rhodamine-labeled  
509 microtubules as described in (Sladewski *et al.*, 2018). Motility assays for all three DDB complexes  
510 (BicD<sup>WT</sup>, BicD<sup>CC1</sup> and BicD<sup>F684I</sup>) were performed on three lanes of a single slide. Total Internal Reflection  
511 Fluorescence (TIRF) microscopy was used to capture images of Qdot labeled-dynein and microtubule  
512 tracks. Imaging was performed on a Nikon ECLIPSE Ti microscope equipped with through-objective  
513 type TIRF and run by the Nikon NIS Elements software. Images were captured at 200 ms temporal and 6  
514 nm spatial resolution. Rhodamine-labeled microtubules and Qdot (655nm)-labeled dynein were excited  
515 with the 488 and 561 nm laser lines, respectively, and images simultaneously recorded at five frames/s  
516 using two Andor EMCCD cameras (Andor Technology USA, South Windsor, CT). Run-length was total  
517 travel distance, and speed was total travel distance divided by time. Binding frequency was normalized to  
518 number of events per time per  $\mu\text{m}$  microtubule. For statistical significance, an unpaired t-test with 95%  
519 confidence interval was performed for the speed data. For run length data, the Kolmogorov-Smirnov test  
520 with a 95% confidence interval was performed.

521

## 522 **Molecular dynamics simulations**

523 MD simulations with implicit solvent were carried out using the CPU implementation of the PMEMD  
524 program in the AMBER16 package (Case *et al.*, 2016) as described (Noell *et al.*, 2019). The use of an  
525 implicit solvent model was justified by comprehensive comparisons of the results to those from explicit  
526 solvent simulations. The PMF or free energy associated with registry shift for the *Dm* BicD-CTD/F684I  
527 mutant was calculated using Eqn. (1) from a single 250 ns trajectory in which both the homotypic and  
528 asymmetric registries were sampled.

$$529 \quad W(\omega, r) = -k_B T \ln P(\omega, r) \quad (1)$$

530  
531 Here,  $W$  is the PMF as a function of a dihedral angle  $\omega$ , more specifically, the C-C<sub>α</sub>-C<sub>β</sub>-C<sub>γ</sub> dihedral angle  
532 of F691 of chain A, and a distance  $r$ , more specifically, the distance between the sidechain N atom of  
533 K678 of chain A and the C<sub>α</sub> atom of E673 of chain B (see Fig. 5).  $k_B$  is the Boltzmann constant,  $T$  is  
534 temperature, and  $P$  is a two-dimensional probability distribution function.

## 535 **CD spectroscopy**

536 Purified *Dm* BicD-CTD/F684I (0.3 mg/ml) was dialyzed in the following buffer: 150 mM NaCl, 10 mM  
537 Tris pH 8 and 0.2 mM TCEP. CD spectra were recorded with a Jasco J-810 CD Spectrometer equipped  
538 with a thermoelectric control device, using a cuvette with a path length of 0.1cm. After the buffer baseline  
539 subtraction, CD signals were normalized to the protein concentration and converted to mean residue  
540 molar ellipticity [θ]. CD spectra from 190 to 260nm were measured at 4°C or 90°C as described (Noell *et al.*  
541 *et al.*, 2019). Thermal unfolding profiles of proteins were recorded by CD spectroscopy at 222 nm as  
542 described (Noell *et al.*, 2019).

## 543 **ACKNOWLEDGMENTS**

544  
545 This paper was supported by the following grants: National Institute of Health, National Institute of  
546 General Medical Sciences (NIH NIGMS) grant 1R15GM128119-01 awarded to S.R.S. and GM078097 to  
547 KMT. Additional funds came from the Chemistry Department at State University of New York at  
548 Binghamton and the Research Foundation of the State University of New York.

549 X-ray diffraction data was collected at Northeastern Collaborative Access Team (NE-CAT) beam line  
550 24ID-C at the Advanced Photon Source (APS), Argonne National Lab (ANL), which are funded by the  
551 National Institute of General Medical Sciences from the National Institutes of Health (P30 GM124165)  
552 and by a NIH-ORIP HEI grant (S10 RR029205). APS is operated by ANL for the DOE under contract  
553 No. DE-AC02-06CH11357. We thank Jonathan P Schuermann from APS and Richard Vallee from  
554 Columbia University for helpful discussions. We also thank Carol Bookwalter and Elena Krementsova  
555 for cloning, protein expression and protein purification. This work used the Extreme Science and  
556 Engineering Discovery Environment (XSEDE)(Townes *et al.*, 2014), which is supported by NSF  
557 grant ACI-1548562. All figures related to the computational studies were made using the Visual  
558 Molecular Dynamics (VMD) program (Humphrey *et al.*, 1996). Furthermore, we thank S. Bane & B.  
559 Callahan (SUNY Binghamton), for access to equipment. Coordinates and structure factors were deposited  
560 to the protein data bank (<https://www ww p d b . o r g>, under PDB ID 6TZW). The content is solely the  
561 responsibility of the authors and does not necessarily represent the official views of the National Institutes  
562 of Health.

## 563 **CONFLICTING INTERESTS**

564  
565 The authors declare that they have no conflicting interests.

566  
567

## REFERENCES

- Adams, P. D., Afonine, P. V., Bunkoczi, G., Chen, V. B., Davis, I. W., Echols, N., Headd, J. J., Hung, L.-W., Kapral, G. J., Grosse-Kunstleve, R. W., McCoy, A. J., Moriarty, N. W., Oeffner, R., Read, R. J., Richardson, D. C., Richardson, J. S., Terwilliger, T. C., & Zwart, P. H. (2010). PHENIX: a comprehensive Python-based system for macromolecular structure solution. *Acta Crystallogr D*, *66*(2), 213-221.
- Baffet, A. D., Hu, D. J., & Vallee, R. B. (2015). Cdk1 activates pre-mitotic nuclear envelope dynein recruitment and apical nuclear migration in neural stem cells. *Dev Cell*, *33*(6), 703-716. doi:10.1016/j.devcel.2015.04.022
- Bianco, A., Dienstbier, M., Salter, H. K., Gatto, G., & Bullock, S. L. (2010). Bicaudal-D Regulates Fragile X Mental Retardation Protein Levels, Motility, and Function during Neuronal Morphogenesis. *Curr Biol*, *20*(16), 1487-1492. doi:10.1016/j.cub.2010.07.016
- Bielska, E., Schuster, M., Roger, Y., Berepiki, A., Soanes, D. M., Talbot, N. J., & Steinberg, G. (2014). Hook is an adapter that coordinates kinesin-3 and dynein cargo attachment on early endosomes. *J Cell Biol*, *204*(6), 989-1007. doi:10.1083/jcb.201309022
- Bingham, J. B., King, S. J., & Schroer, T. A. (1998). Purification of dynactin and dynein from brain tissue. *Methods Enzymol*, *298*, 171-184.
- Bull, A. L. (1966). Bicaudal, a genetic factor which affects the polarity of the embryo in *Drosophila melanogaster*. *J Exp Zool*, *161*(2), 221-241. doi:10.1002/jez.1401610207
- Bullock, S. L., Nicol, A., Gross, S. P., & Zicha, D. (2006). Guidance of Bidirectional Motor Complexes by mRNA Cargoes through Control of Dynein Number and Activity. *Curr Biol*, *16*(14), 1447-1452. doi:10.1016/j.cub.2006.05.055
- Cantalupo, G., Alifano, P., Roberti, V., Bruni, C. B., & Bucci, C. (2001). Rab-interacting lysosomal protein (RILP): the Rab7 effector required for transport to lysosomes. *EMBO J*, *20*(4), 683-693. doi:10.1093/emboj/20.4.683
- Carter, A. P., Garbarino, J. E., Wilson-Kubalek, E. M., Shipley, W. E., Cho, C., Milligan, R. A., Vale, R. D., & Gibbons, I. R. (2008). Structure and functional role of dynein's microtubule-binding domain. *Science*, *322*(5908), 1691-1695. doi:10.1126/science.1164424
- Case, D. A., Betz, R. M., Cerutti, D. S., Cheatham III, T. E., Darden, T. A., Duke, R. E., Giese, T. J., Gohlke, H., Goetz, A. W., Homeyer, N., Izadi, S., Janowski, P., Kaus, J., Kovalenko, A., Lee, T. S., LeGrand, S., Li, P., Lin, C., Luchko, T., Luo, R., Madej, B., Mermelstein, D., Merz, K. M., Monard, G., Nguyen, H., Nguyen, H. T., Omelyan, I., Onufriev, A., Roe, D. R., Roitberg, A., Sagui, C., Simmerling, C. L., Botello-Smith, W. M., Swails, J., Walker, R. C., Wang, J., Wolf, R. M., Wu, X., Xiao, L., & Kollman, P. A. (2016). AMBER 2016, University of California, San Francisco.
- Chen, V. B., Arendall, W. B., Headd, J. J., Keedy, D. A., Immormino, R. M., Kapral, G. J., Murray, L. W., Richardson, J. S., & Richardson, D. C. (2010). MolProbity: all-atom structure validation for macromolecular crystallography. *Acta Crystallogr D Biol Crystallogr*, *66*(Pt 1), 12-21. doi:10.1107/S0907444909042073
- Choi, J., Park, H., & Seok, C. (2011). How Does a Registry Change in Dynein's Coiled-Coil Stalk Drive Binding of Dynein to Microtubules? *Biochemistry*, *50*(35), 7629-7636. doi:10.1021/bi200834k
- Chowdhury, S., Ketcham, S. A., Schroer, T. A., & Lander, G. C. (2015). Structural organization of the dynein-dynactin complex bound to microtubules. *Nat Struct Mol Biol*, *22*(4), 345-347. doi:10.1038/nsmb.2996
- Cianfrocco, M. A., DeSantis, M. E., Leschziner, A. E., & Reck-Peterson, S. L. (2015). Mechanism and regulation of cytoplasmic dynein. *Annu Rev Cell Dev Biol*, *31*(1), 83-108. doi:10.1146/annurev-cellbio-100814-125438
- Crick, F. (1953). The packing of alpha-helices: simple coiled-coils. *Acta Cryst*, *6*, 689-697. doi:10.1107/S0365110X53001964

- Croasdale, R., Ivins, F. J., Muskett, F., Daviter, T., Scott, D. J., Hardy, T., Smerdon, S. J., Fry, A. M., & Pfuhl, M. (2011). An Undecided Coiled Coil: the Leucine Zipper of Nek2 Kinase Exhibits Atypical Conformational Exchange Dynamics. *J Biol Chem*, *286*(31), 27537-27547. doi:10.1074/jbc.M110.196972
- Cui, H., Loftus, K., Noell, C., & Solmaz, S. (2018). Identification of cyclin-dependent kinase 1 specific phosphorylation sites by an in vitro kinase assay. *J Vis Exp*, *135* 10.3791/57674. doi:10.3791/57674
- Dienstbier, M., Boehl, F., Li, X., & Bullock, S. L. (2009). Egalitarian is a selective RNA-binding protein linking mRNA localization signals to the dynein motor. *Genes Dev*, *23*(13), 1546-1558. doi:10.1101/gad.531009
- Efimov, V. P., & Morris, N. R. (2000). The Lis1-Related Nudf Protein of *Aspergillus nidulans* Interacts with the Coiled-Coil Domain of the Nude/Ro11 Protein. *J Cell Biol*, *150*(3), 681. doi:10.1083/jcb.150.3.681
- Emsley, P., Lohkamp, B., Scott, W. G., & Cowtan, K. (2010). Features and development of Coot. *Acta Cryst D*, *D66*, 486-501.
- Gibbons, I. R., Garbarino, J. E., Tan, C. E., Reck-Peterson, S. L., Vale, R. D., & Carter, A. P. (2005). The Affinity of the Dynein Microtubule-Binding Domain is Modulated by the Conformation of its Coiled-Coil Stalk. *J Biol Chem*, *280*(25), 23960-23965. doi:10.1074/jbc.M501636200
- Griffis, E. R., Stuurman, N., & Vale, R. D. (2007). Spindly, a novel protein essential for silencing the spindle assembly checkpoint, recruits dynein to the kinetochore. *J Cell Biol*, *177*(6), 1005. doi:10.1083/jcb.200702062
- Hoogenraad, C. C., Akhmanova, A., Howell, S. A., Dortland, B. R., De Zeeuw, C. I., Willemsen, R., Visser, P., Grosveld, F., & Galjart, N. (2001). Mammalian Golgi associated Bicaudal D2 functions in the dynein dynactin pathway by interacting with these complexes. *EMBO J*, *20*, 4041-4054. doi:10.1093/emboj/20.15.4041
- Hu, D. J., Baffet, A. D., Nayak, T., Akhmanova, A., Doye, V., & Vallee, R. B. (2013). Dynein recruitment to nuclear pores activates apical nuclear migration and mitotic entry in brain progenitor cells. *Cell*, *154*(6), 1300-1313. doi:10.1016/j.cell.2013.08.024
- Humphrey, W., Dalke, A., & Schulten, K. (1996). VMD: Visual molecular dynamics. *J Mol Graph*, *14*(1), 33-38. doi:https://doi.org/10.1016/0263-7855(96)00018-5
- Jurrus, E., Engel, D., Star, K., Monson, K., Brandi, J., Felberg, L. E., Brookes, D. H., Wilson, L., Chen, J., Liles, K., Chun, M., Li, P., Gohara, D. W., Dolinsky, T., Konecny, R., Koes, D. R., Nielsen, J. E., Head-Gordon, T., Geng, W., Krasny, R., Wei, G.-W., Holst, M. J., McCammon, J. A., & Baker, N. A. (2018). Improvements to the APBS biomolecular solvation software suite. *Protein Science*, *27*(1), 112-128. doi:10.1002/pro.3280
- Kon, T., Imamula, K., Roberts, A. J., Ohkura, R., Knight, P. J., Gibbons, I. R., Burgess, S. A., & Sutoh, K. (2009). Helix sliding in the stalk coiled coil of dynein couples ATPase and microtubule binding. *Nat Struct & Mol Biol*, *16*(3), 325-333. doi:10.1038/nsmb.1555
- Krissinel, E., & Henrick, K. (2007). Inference of macromolecular assemblies from crystalline state. *J Mol Biol*, *372*, 774-797.
- Liu, Y., Salter, H. K., Holding, A. N., Johnson, C. M., Stephens, E., Lukavsky, P. J., Walshaw, J., & Bullock, S. L. (2013). Bicaudal-D uses a parallel, homodimeric coiled coil with heterotypic registry to coordinate recruitment of cargos to dynein. *Genes Dev*, *27*(11), 1233-1246. doi:10.1101/gad.212381.112
- Loftus, K. M., Coutavas, E., Cui, H., King, D., Ceravolo, A., Pereiras, D., & Solmaz, S. (2017). Mechanism for G2 phase-specific nuclear export of the kinetochore protein CENP-F. *Cell Cycle*, *16*(15), 1414-1429. doi:http://dx.doi.org/10.1080/15384101.2017.1338218
- Mach, J. M., & Lehmann, R. (1997). An Egalitarian-BicaudalD complex is essential for oocyte specification and axis determination in *Drosophila*. *Genes Dev*, *11*(4), 423-435.

- Macheboeuf, P., Buffalo, C., Fu, C.-y., Zinkernagel, A. S., Cole, J. N., Johnson, J. E., Nizet, V., & Ghosh, P. (2011). Streptococcal M1 protein constructs a pathological host fibrinogen network. *Nature*, *472*(7341), 64-68. doi:10.1038/nature09967
- Martinez-Carrera, L. A., & Wirth, B. (2015). Dominant spinal muscular atrophy is caused by mutations in BICD2, an important golgin protein. *Front Neurosci*, *9*, 401. doi:10.3389/fnins.2015.00401
- Matanis, T., Akhmanova, A., Wulf, P., Del Nery, E., Weide, T., Stepanova, T., Galjart, N., Grosveld, F., Goud, B., De Zeeuw, C. I., Barnekow, A., & Hoogenraad, C. C. (2002). Bicaudal-D regulates COPI-independent Golgi-ER transport by recruiting the dynein-dynactin motor complex. *Nat Cell Biol*, *4*(12), 986-992.
- McClintock, M. A., Dix, C. I., Johnson, C. M., McLaughlin, S. H., Maizels, R. J., Hoang, H. T., & Bullock, S. L. (2018). RNA-directed activation of cytoplasmic dynein-1 in reconstituted transport RNPs. *eLife*, *7*, e36312. doi:10.7554/eLife.36312
- McKenney, R. J., Huynh, W., Tanenbaum, M. E., Bhabha, G., & Vale, R. D. (2014). Activation of cytoplasmic dynein motility by dynactin-cargo adapter complexes. *Science*, *345*(6194), 337-341. doi:10.1126/science.1254198
- Mohler, J., & Wieschaus, E. F. (1986). Dominant maternal-effect mutations of *Drosophila melanogaster* causing the production of double-abdomen embryos. *Genetics*, *112*(4), 803-822.
- Mosalaganti, S., Keller, J., Altenfeld, A., Winzker, M., Rombaut, P., Saur, M., Petrovic, A., Wehenkel, A., Wohlgemuth, S., Müller, F., Maffini, S., Bange, T., Herzog, F., Waldmann, H., Raunser, S., & Musacchio, A. (2017). Structure of the RZZ complex and molecular basis of its interaction with Spindly. *J Cell Biol*, *216*(4), 961-981. doi:10.1083/jcb.201611060
- Navarro, C., Puthalakath, H., Adams, J. M., Strasser, A., & Lehmann, R. (2004). Egalitarian binds dynein light chain to establish oocyte polarity and maintain oocyte fate. *Nat Cell Biol*, *6*(5), 427-435. doi:10.1038/ncb1122
- Niethammer, M., Smith, D. S., Ayala, R., Peng, J., Ko, J., Lee, M.-S., Morabito, M., & Tsai, L.-H. (2000). NUDEL Is a Novel Cdk5 Substrate that Associates with LIS1 and Cytoplasmic Dynein. *Neuron*, *28*(3), 697-711. doi:10.1016/S0896-6273(00)00147-1
- Noell, C. R., Loftus, K. M., Cui, H., Grewer, C. T., Kizer, M., Debler, E. W., & Solmaz, S. R. (2018). A quantitative model for BicD2/cargo interactions. *Biochemistry*, *57*(46), 6538-6550. doi:10.1021/acs.biochem.8b00987
- Noell, C. R., Loh, J. Y., Debler, E. W., Loftus, K. M., Cui, H., Russ, B. B., Zhang, K., Goyal, P., & Solmaz, S. R. (2019). Role of Coiled-Coil Registry Shifts in the Activation of Human Bicaudal D2 for Dynein Recruitment upon Cargo Binding. *J Phys Chem Lett*, *10*(15), 4362-4367. doi:10.1021/acs.jpcllett.9b01865
- O'Shea, E., Klemm, J., Kim, P., & Alber, T. (1991). X-ray structure of the GCN4 leucine zipper, a two-stranded, parallel coiled coil. *Science*, *254*(5031), 539-544. doi:10.1126/science.1948029
- Olenick, M. A., Dominguez, R., & Holzbaur, E. L. F. (2019). Dynein activator Hook1 is required for trafficking of BDNF-signaling endosomes in neurons. *J Cell Biol*, *218*(1), 220. doi:10.1083/jcb.201805016
- Peeters, K., Litvinenko, I., Asselbergh, B., Almeida-Souza, L., Chamova, T., Geuens, T., Ydens, E., Zimon, M., Irobi, J., De Vriendt, E., De Winter, V., Ooms, T., Timmerman, V., Tournev, I., & Jordanova, A. (2013). Molecular defects in the motor adaptor BICD2 cause proximal spinal muscular atrophy with autosomal-dominant inheritance. *Am J Hum Gen*, *92*(6), 955-964. doi:10.1016/j.ajhg.2013.04.013
- Schlager, M. A., Hoang, H. T., Urnavicius, L., Bullock, S. L., & Carter, A. P. (2014). In vitro reconstitution of a highly processive recombinant human dynein complex. *EMBO J*, *33*, 1855-1868. doi:10.15252/embj.201488792
- Schlager, M. A., Serra-Marques, A., Grigoriev, I., Gummy, L. F., Esteves da Silva, M., Wulf, P. S., Akhmanova, A., & Hoogenraad, C. C. (2014). Bicaudal D family adaptor proteins control the velocity of dynein-based movements. *Cell Rep*, *8*(5), 1248-1256. doi:10.1016/j.celrep.2014.07.052



- Sladewski, T. E., Billington, N., Ali, M. Y., Bookwalter, C. S., Lu, H., Kremontsova, E. B., Schroer, T. A., & Trybus, K. M. (2018). Recruitment of two dyneins to an mRNA-dependent Bicaudal D transport complex. *eLife*, *7*, e36306. doi:10.7554/eLife.36306
- Snoberger, A., Brettrager, E. J., & Smith, D. M. (2018). Conformational switching in the coiled-coil domains of a proteasomal ATPase regulates substrate processing. *Nat Commun*, *9*, 2374. doi:10.1038/s41467-018-04731-6
- Splinter, D., Razafsky, D. S., Schlager, M. A., Serra-Marques, A., Grigoriev, I., Demmers, J., Keijzer, N., Jiang, K., Poser, I., Hyman, A. A., Hoogenraad, C. C., King, S. J., & Akhmanova, A. (2012). BICD2, dynactin, and LIS1 cooperate in regulating dynein recruitment to cellular structures. *Mol Biol Cell*, *23*(21), 4226-4241. doi:10.1091/mbc.E12-03-0210
- Splinter, D., Tanenbaum, M. E., Lindqvist, A., Jaarsma, D., Flotho, A., Yu, K. L., Grigoriev, I., Engelsma, D., Haasdijk, E. D., Keijzer, N., Demmers, J., Fornerod, M., Melchior, F., Hoogenraad, C. C., Medema, R. H., & Akhmanova, A. (2010). Bicaudal D2, dynein, and kinesin-1 associate with nuclear pore complexes and regulate centrosome and nuclear positioning during mitotic entry. *PLoS Biol*, *8*(4), e1000350.
- Stathopoulos, P. B., Schindl, R., Fahrner, M., Zheng, L., Gasmi-Seabrook, G. M., Muik, M., Romanin, C., & Ikura, M. (2013). STIM1/Orai1 coiled-coil interplay in the regulation of store-operated calcium entry. *Nat Commun*, *4*, 2963-2963. doi:10.1038/ncomms3963
- Stehman, S. A., Chen, Y., McKenney, R. J., & Vallee, R. B. (2007). NudE and NudEL are required for mitotic progression and are involved in dynein recruitment to kinetochores. *J Cell Biol*, *178*(4), 583. doi:10.1083/jcb.200610112
- Synofzik, M., Martinez-Carrera, L. A., Lindig, T., Schöls, L., & Wirth, B. (2014). Dominant spinal muscular atrophy due to BICD2: a novel mutation refines the phenotype. *J Neurol Neurosurg Psychiatry*, *85*(5), 590-592. doi:10.1136/jnnp-2013-306777
- Terawaki, S., Yoshikane, A., Higuchi, Y., & Wakamatsu, K. (2015). Structural basis for cargo binding and autoinhibition of Bicaudal-D1 by a parallel coiled-coil with homotypic registry. *Biochem Biophys Res Commun*, *460*(2), 451-456.
- Towns, J., Cockerill, T., Dahan, M., Foster, I., Gaither, K., Grimshaw, A., Hazlewood, V., Lathrop, S., Lifka, D., Peterson, G. D., Roskies, R., Scott, J. R., & Wilkins-Diehr, N. (2014). XSEDE: Accelerating Scientific Discovery. *Comput Sci Eng*, *16*(5), 62-74. doi:10.1109/MCSE.2014.80
- Urnavicius, L., Zhang, K., Diamant, A. G., Motz, C., Schlager, M. A., Yu, M., Patel, N. A., Robinson, C. V., & Carter, A. P. (2015). The structure of the dynactin complex and its interaction with dynein. *Science*, *347*(6229), 1441-1446. doi:10.1126/science.aaa4080
- Walshaw, J., & Woolfson, D. N. (2001). SOCKET: a program for identifying and analysing coiled-coil motifs within protein structures. *J Mol Biol*, *307*(5), 1427-1450.
- Wharton, R. P., & Struhl, G. (1989). Structure of the Drosophila Bicaudal D protein and its role in localizing the posterior determinant nanos. *Cell*, *59*(5), 881-892. doi:10.1016/0092-8674(89)90611-9
- Xi, Z., Gao, Y., Sirinakis, G., Guo, H., & Zhang, Y. (2012). Single-molecule observation of helix staggering, sliding, and coiled coil misfolding. *Proc Natl Acad of Sci U S A*, *109*(15), 5711-5716. doi:10.1073/pnas.1116784109
- Zimyanin, V. L., Belaya, K., Pécereaux, J., Gilchrist, M. J., Clark, A., Davis, I., & St Johnston, D. (2008). In vivo imaging of oskar mRNA transport reveals the mechanism of posterior localization. *Cell*, *134*(5), 843-853. doi:10.1016/j.cell.2008.06.053

**Table 1 Crystallographic statistics**

---

| <b>Data collection statistics</b>                  |                         |
|----------------------------------------------------|-------------------------|
| Space group                                        | $P 3_1 2 1$             |
| Unit cell parameters a, b, c (Å)                   | 60.0, 60.0, 142.6       |
| Unit cell parameters $\alpha$ , $\beta$ , $\gamma$ | 90°, 90°, 120°          |
| Wavelength (Å)                                     | 0.9791                  |
| Resolution range (Å)                               | 19.47-2.35 (2.434-2.35) |
| Total Reflections                                  | 125766 (12111)          |
| Unique Reflections                                 | 12955 (1263)            |
| Redundancy                                         | 9.7 (9.6)               |
| Completeness (%)                                   | 99.39 (99.92)           |
| $I/\sigma(I)$                                      | 27.98 (1.26)            |
| Wilson B-factor (Å <sup>2</sup> )                  | 72.37                   |
| $R_{\text{merge}}$                                 | 0.0443 (1.621)          |
| $R_{\text{meas}}$                                  | 0.04684 (1.713)         |
| $R_{\text{pim}}$                                   | 0.01498 (0.549)         |
| CC1/2                                              | 1 (0.573)               |
| CC*                                                | 1 (0.854)               |
| <br>                                               |                         |
| <b>Refinement statistics</b>                       |                         |
| $R_{\text{free}}$ (%)                              | 25.99 (38.38)           |
| $R_{\text{work}}$ (%)                              | 25.06 (36.04)           |
| Reflections (work/test sets)                       | 12948/640               |
| R.m.s.d. bonds (Å)/angles                          | 0.005/0.77              |
| Average B-factor (Å <sup>2</sup> )                 | 96.46                   |
| <br>                                               |                         |
| <b>MolProbity validation</b>                       |                         |
| Ramachandran plot favored                          | 100%                    |
| Ramachandran plot allowed                          | 0%                      |
| Ramachandran plot outliers                         | 0%                      |
| Rotamer outliers                                   | 0.85%                   |
| Clash score                                        | 1.83                    |

---

The statistics for the high-resolution shell are shown in parenthesis.

**Table 2 Numbering of homologous key residues in *Dm* BicD and *Hs* BicD2**

|                            | <b><i>Dm</i> BicD</b>  | <b><i>Hs</i> BicD2</b> |
|----------------------------|------------------------|------------------------|
| Conversion                 | Residue <i>i</i>       | Residue <i>i</i> +59   |
| C-terminal domain (CTD)    | 656-745                | 715-804                |
| Bicaudal mutant            | F684I                  | F743I                  |
| Key aromatic residues      | F684, F691, Y698       | F743, F750, Y757       |
| Nup358 interface residues* | L687, R688, M690, R694 | L746, R747, M749, R753 |

\*Interface residues were mapped for *Ms* BicD1, a close homolog of *Hs* BicD2 (Terawaki *et al.*, 2015). Residue *i* of *Hs* BicD2 (as listed in the table) is homologous to residue *i*-2 of *Ms* BicD1.

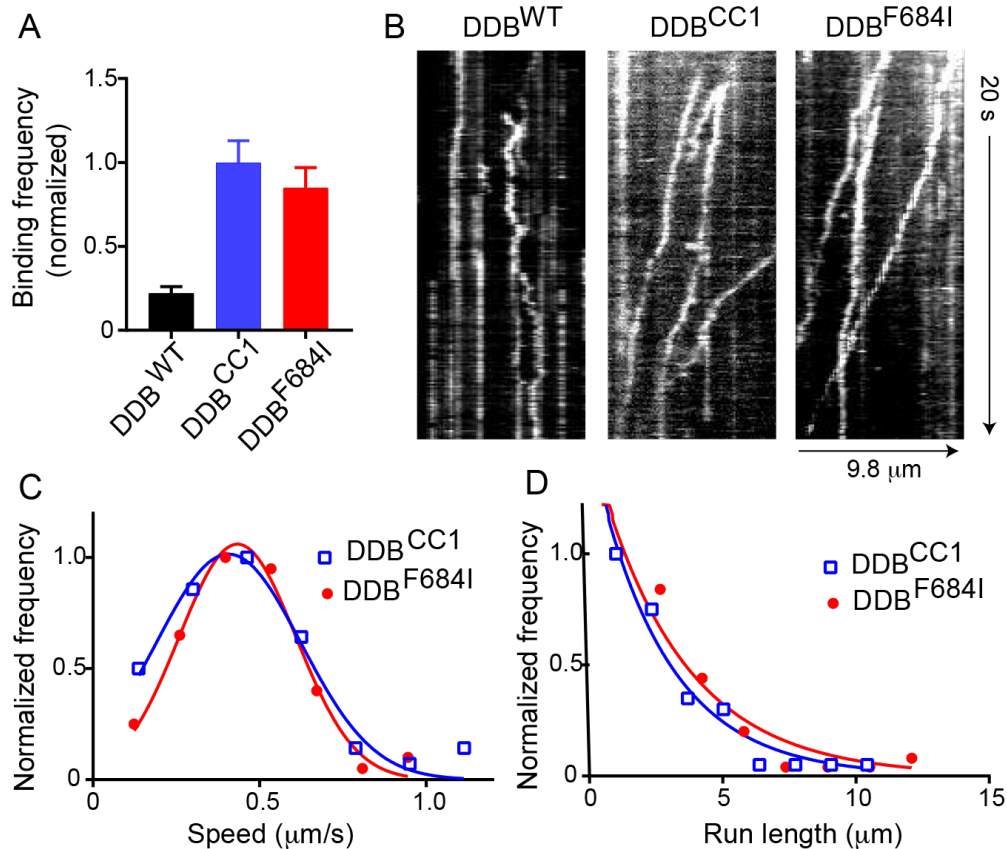

**Figure 1. Full-length *Dm* BicD<sup>F684I</sup> results in cargo-independent activation of dynein motility.** (A) Normalized run frequency of dynein-dynactin-BicD (DDB) with different *Dm* BicD constructs: full-length BicD<sup>WT</sup> (black), truncated BicD<sup>CC1</sup> (blue), and full-length mutant BicD<sup>F684I</sup> (red). The binding frequency of DDB<sup>CC1</sup> is normalized to one. Frequencies of DDB<sup>CC1</sup> and DDB<sup>F684I</sup> are 4.5-fold and 3.8-fold higher, respectively, than DDB<sup>WT</sup>. Motion of DDB<sup>WT</sup> is mainly diffusive. (B) Kymographs of the three DDB complexes. DDB<sup>WT</sup> is either static or diffusive, while the other two complexes show processive motion (sloped lines). (C) The speed of DDB<sup>CC1</sup> (blue) and DDB<sup>F684I</sup> (red) are  $0.41 \pm 0.21 \mu\text{m/s}$ ,  $n=58$ ) and  $0.43 \pm 0.17 \mu\text{m/s}$  ( $n=68$ ) (mean  $\pm$  SD), respectively, which were not significantly different ( $p=0.44$ ). (D) Run length of DDB<sup>CC1</sup> ( $2.8 \pm 0.13 \mu\text{m}$ ,  $n=58$ , blue) and DDB<sup>F684I</sup> ( $3.3 \pm 0.18 \mu\text{m}$ ,  $n=68$ , red) (mean  $\pm$  SD) were not significantly different ( $p=0.9$ ). Data from 3 independent experiments were pooled.

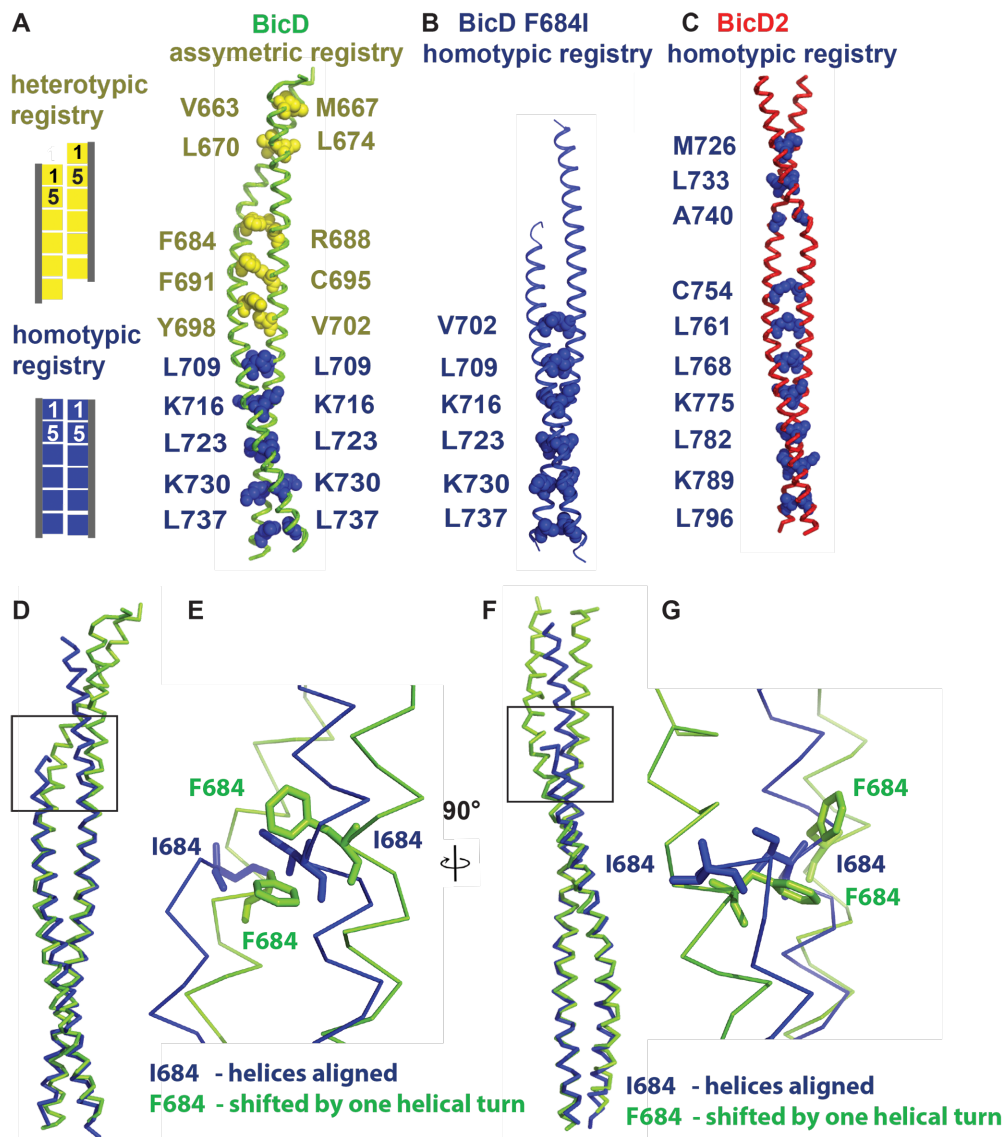

**Figure 2 *Dm* BicD-CTD/F684I assumes a conformation with homotypic coiled-coil registry.** (A) The structure of *Dm* BicD-CTD wild type (PDB ID 4BL6) (Liu *et al.*, 2013) which has an asymmetric coiled-coil registry is shown in cartoon representation next to a schematic illustrating coiled-coil registries (left panel). Knob residues in the “a” position of the heptad repeat are shown in spheres representation (heterotypic registry yellow, homotypic registry dark blue). (B) Structure of *Dm* BicD-CTD/F684I, which has a homotypic registry. (C) Structure of *Hs* BicD2-CTD (PDB ID 6OFP) (Noell *et al.*, 2019), which has a homotypic registry. (D-G) Least squares superimposed structures of the *Dm* BicD-CTD wild type (green) and the F684I mutant (dark blue) are shown as C- $\alpha$  traces, and are rotated by 90° in (D, F). (E, G) Close-up of the boxed area in (D, F). Residues F684 and I684 are shown in stick representation. Note that in the structure of the BicD mutant, the I684 residues from both chains of the dimer are aligned at the same height, consistent with a homotypic registry, while in the wild-type structure, the F684 residues from both monomers are vertically shifted by one helical turn respective to each other, consistent with a heterotypic registry.

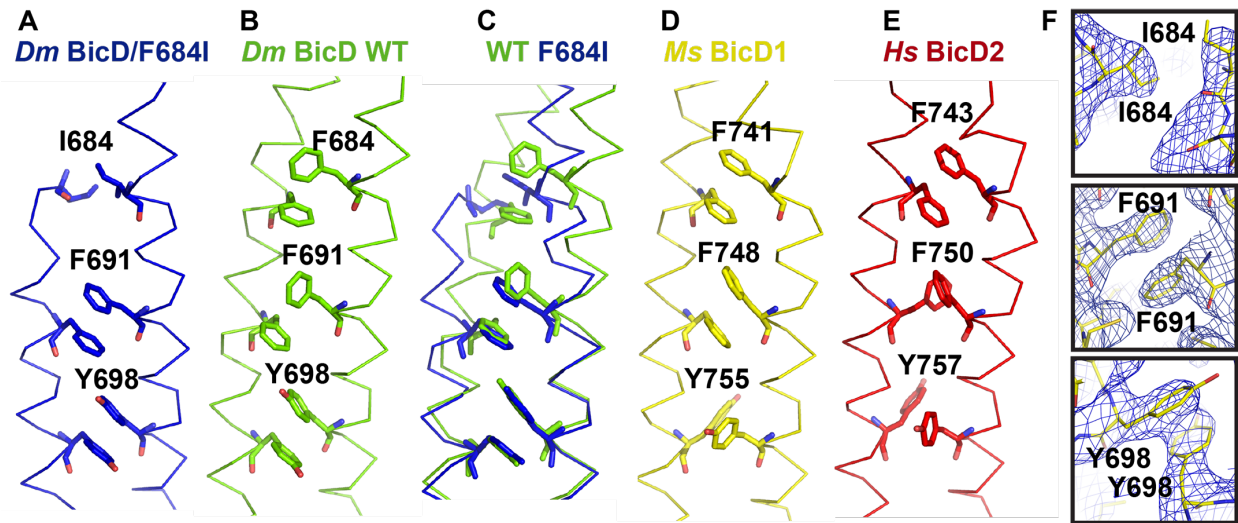

**Figure 3. Conformation of key aromatic residues in *Dm* BicD-CTD/F684I.** (A) The  $\text{C}\alpha$ -trace of the structure of *Dm* BicD-CTD/F684I is shown (blue). Residues I684, F691, Y698 are labeled and shown in stick representation. (B) Structure of the wild-type *Dm* BicD-CTD (green, PDB ID 4BL6) (Liu *et al.*, 2013). (C) Least squares superimposed structures of *Dm* BicD-CTD/F684I and the wild type. (D, E) Structures of the *Dm* BicD homologs (D) *Ms* BicD1-CTD (yellow, PDB ID 4YTD) (Terawaki *et al.*, 2015) and (E) *Hs* BicD2-CTD (red, PDB ID 6OFP) (Noell *et al.*, 2019). (F) Structure of the *Dm* BicD-CTD/F684I mutant in stick representation overlaid with the  $2F_o-F_c$  electron density map (blue mesh). Close-ups of residues I684, F691 and Y698 are shown in three panels. Note that residues F691 from both chains are oriented face-to-face, as observed in the structures with the homotypic registries.

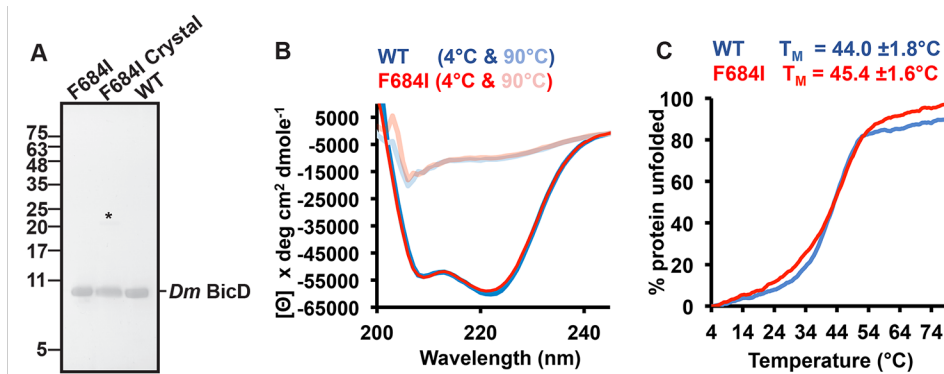

**Figure 4** The intact *Dm* BicD-CTD/F684I is present in the crystal and it is fully folded. (A) SDS-PAGE analysis of purified *Dm* BicD-CTD/F684I (left lane), *Dm* BicD-CTD/F684I crystals (middle lane), and purified wild-type protein (right lane). The position of the dimer band is indicated by an asterisk. For the crystal sample, 20 crystals were washed three times with reservoir buffer before being dissolved in gel filtration buffer. (B) CD wavelength scans of *Dm* BicD-CTD WT (blue) and *Dm* BicD-CTD/F684I (red) at 4°C (native) and 90°C (random coil). The mean residue molar ellipticity  $[\Theta]$  versus the wavelength is shown. Experiments were repeated three times, representative scans are shown. See also Fig. S2. (C) Thermal unfolding curves of wild type (blue) and F684I (red) were recorded by CD spectroscopy at 222 nm. Molar ellipticity  $[\Theta]$  versus temperature is plotted. 0% and 100% protein unfolded represent the values of  $[\Theta]_{\min}$  and  $[\Theta]_{\max}$ , respectively. Representative experiments are shown; melting temperatures  $T_M$  of *Dm* BicD-CTD WT and F684I are shown and were averaged from three experiments.

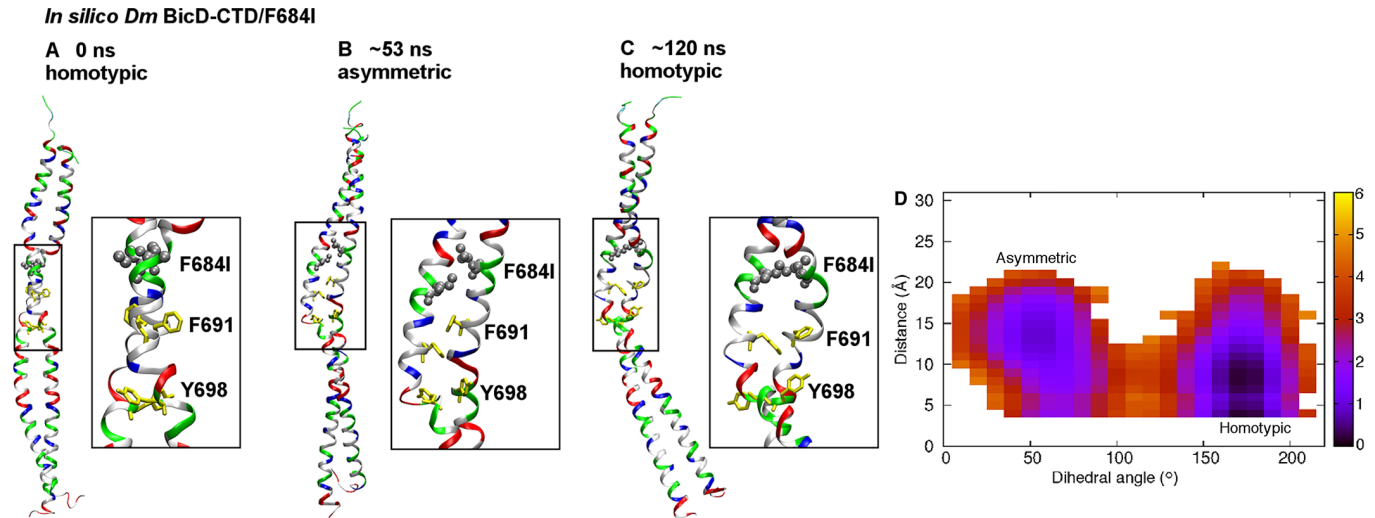

**Figure 5. MD simulations suggest that the *Dm* BicD-CTD/F684I mutant switches between homotypic and asymmetric registries, with the N-terminal region switching between homotypic and heterotypic registries.** (A) Cartoon representation of the equilibrated structure of *Dm* BicD-CTD/F684I (Noell *et al.*, 2019), with homotypic registry, colored by residue type (blue: positively charged, red: negatively charged, green: polar, white: non-polar). F684 was mutated to isoleucine (silver spheres). F691 and Y698 are shown in yellow stick representation. A close-up of the boxed area is shown on the right. See also File S1. (B) Structure of the F684I mutant of *Dm* BicD-CTD after ~53 ns of an MD simulation. Note that the N-terminal region of the coiled-coil switches to a heterotypic registry; therefore, the overall coiled-coil registry is asymmetric. See also File S2. (C) Structure of the F684I mutant of *Dm* BicD-CTD after ~120 ns of the same MD simulation. Note that the structure switches back to a homotypic coiled-coil registry. However, the solvent-exposed F691 sidechains are oriented towards the same side, as opposed to opposite sides in A. This leads to a slight distortion of the coiled coil around the F691 residues. See also File S3. (D) Free energy in kcal/mol as a function of the C-C<sub>α</sub>-C<sub>β</sub>-C<sub>γ</sub> dihedral angle of F691 of chain A (plotted along the horizontal axis), and the distance between the sidechain N atom of K678 of chain A and the C<sub>α</sub> atom of E673 of chain B (plotted along the vertical axis). The distance between the sidechain N atom and C<sub>α</sub> was chosen, since both oxygen atoms of the carboxyl group can engage in salt bridge formation. The free energy is depicted using a color map that ranges from 0 to 6 kcal/mol. The free energy difference between the minima is ~1 kcal/mol, with a free energy barrier of ~4-5 kcal/mol.



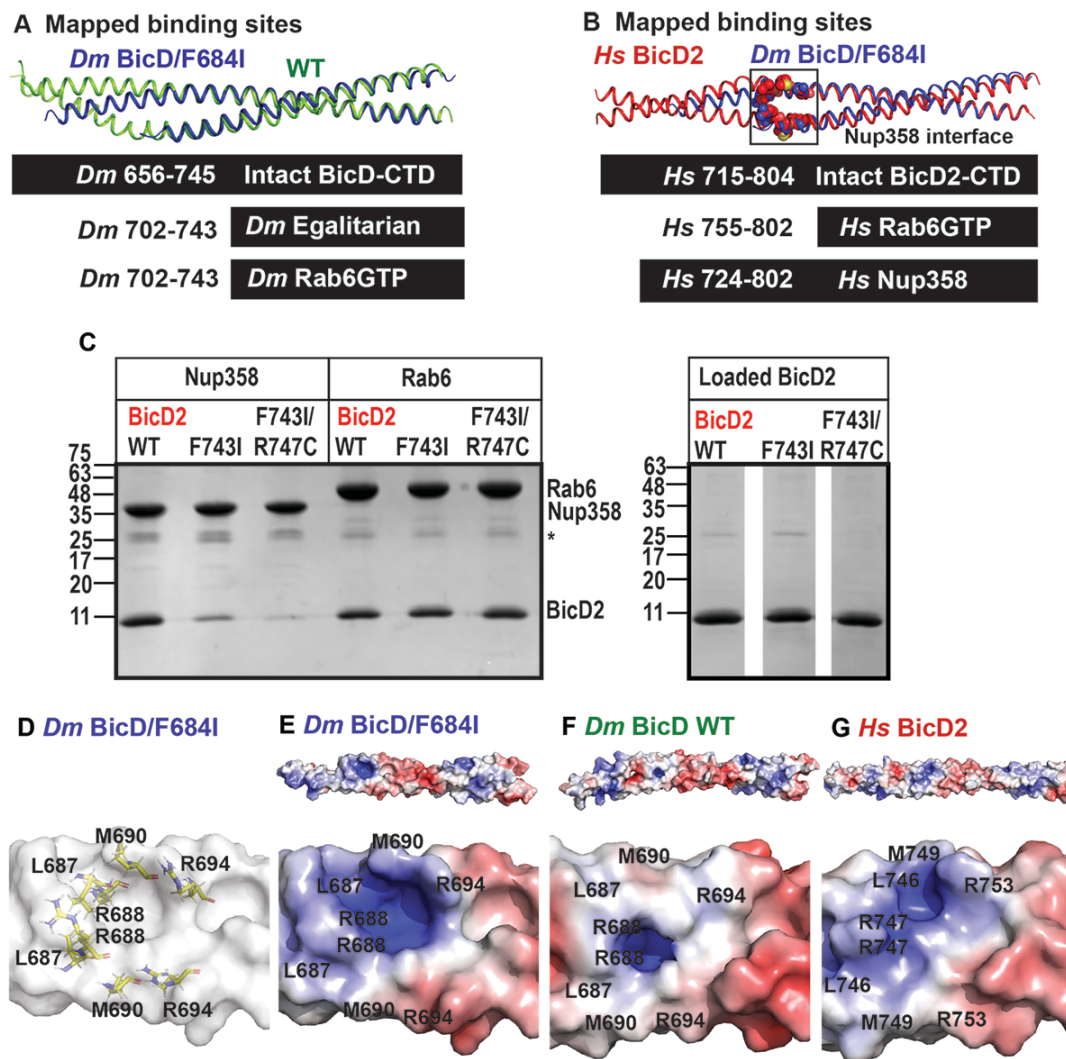

**Figure 6. Role of coiled-coil registry shifts in cargo selection of human BicD2.** (A) Least-squares superimposition of the structures of *Dm* BicD-CTD/F684I (dark blue) and wild-type (green) in cartoon representation is shown. A schematic representation of the intact *Dm* BicD-CTD (black bar) and of the mapped cargo adaptor binding sites including residue numbers is shown below. (B) Least squares superimposition of the structures of *Dm* BicD-CTD/F684I (dark blue) and *Hs* BicD2-CTD (red) in cartoon representation, with a schematic representation of the intact protein and the mapped cargo adaptor binding sites below. Known Nup358/BicD2 interface residues (see Table 2) are shown in spheres representation (Terawaki *et al.*, 2015). (C) Pull-down-assays of BicD2-CTD (wild type, F743I or F743I/R747C mutant) with the GST-tagged cargo adaptors Rab6<sup>GTP</sup>-GST and Nup358-min-GST. An asterisk indicates the location of the GST-band. An SDS-PAGE of the elution fractions is shown in the left panel. Right panel: SDS-PAGE analysis of the BicD2-CTD load fractions. Pull-down assays were repeated three times with similar results. (D) Surface representation of the structure of *Dm* BicD-CTD/F684I. Several important Nup358/BicD2 interface residues are known (Terawaki *et al.*, 2015) (see Table 2); homologous *Dm* residues are shown in stick representation and labeled. (E-G) The surface electrostatic potential of distinct structures is shown. Positive (blue: 5 kT/e) and negative (red: -5 kT/e) potentials are mapped on the solvent excluded molecular surface (top panel). The bottom panel shows a close-up of the known BicD2/Nup358 interface residues. The same view as in (D) is shown. (E) *Dm* BicD-CTD/F684I. (F) *Dm* BicD-CTD wild type (Liu *et al.*, 2013). (G) *Hs* BicD2-CTD (Noell *et al.*, 2019).
